# Supplementary material
Source: PubMed Central journal article supplement (PMC6830441)
Supplement: jamainternmed-180-91-s001.pdf [file jamainternmed-180-91-s001.pdf]

## Supplementary Online Content

Garland E, Brintz CE, Hanley AW, et al. Mind-body therapies for opioid-treated pain: a systematic review and meta-analysis. *JAMA Intern Med*. Published online November 4, 2019. doi:10.1001/jamainternmed.2019.4917

**eMethods.** Supplementary Methods

**eTable 1.** Characteristics of Meditation Studies

**eTable 2.** Findings of Meditation Studies

**eTable 3.** Characteristics of Hypnosis Studies

**eTable 4.** Findings of Hypnosis Studies

**eTable 5.** Characteristics of Relaxation Studies

**eTable 6.** Findings of Relaxation Studies

**eTable 7.** Characteristics of Guided Imagery Studies

**eTable 8.** Findings of Guided Imagery Studies

**eTable 9.** Characteristics of Therapeutic Suggestion Studies

**eTable 10.** Findings of Therapeutic Suggestion Studies

**eTable 11.** Characteristics of Cognitive Behavioral Therapy Studies

**eTable 12.** Findings of Cognitive Behavioral Therapy Studies

**eFigure 1.** Meta-analysis of Meditation Studies on Pain Outcomes

**eFigure 2.** Meta-analysis of Hypnosis Studies on Pain Outcomes

**eFigure 3.** Meta-analysis of Relaxation Studies on Pain Outcomes

**eFigure 4.** Meta-analysis of Suggestion Studies on Pain Outcomes

**eFigure 5.** Meta-analysis of Cognitive-Behavioral Therapy Studies on Pain Outcomes

**eFigure 6.** Baujut Plots

**eFigure 7.** Funnel Plots

**eFigure 8.** RoB Across All Studies

**eFigure 9.** RoB for Meditation Studies

**eFigure 10.** RoB for Hypnosis Studies

**eFigure 11.** RoB for Relaxation Studies

**eFigure 12.** RoB for Guided Imagery Studies

**eFigure 13.** RoB for Therapeutic Suggestion Studies

**eFigure 14.** RoB for CBT Studies

This supplementary material has been provided by the authors to give readers additional information about their work.

© 2019 American Medical Association. All rights reserved.

**eMethods.** Supplementary Methods

**Search Strategy.** Searches were conducted in March 2018 and were run from date of database inception forward, in the following databases: CINAHL 1981-; Cochrane Library: Cochrane Register of Controlled Trials, Cochrane Database of Systematic Reviews, Database of Abstracts of Reviews of Effectiveness, Health Technology Database; Emcare (via OVID) 1995-; Medline In-Process & Other Non-Indexed Citations; Ovid MEDLINE(R) Daily and MEDLINE(R) <1946 - > (via OVID); PsycInfo (via Ebsco) 1800-

**Other search methods.** We searched three grey literature sites for material not indexed in the above-named databases: Agency for Health Care Quality and Research; American Psychological Association; World Health Organization. We hand-searched the reference lists of related reviews, and contacted authors of studies where data was either missing or unclear.

**Search Data Management.** Results from bibliographic database searches were organized and de-duplicated in EndNote. A second duplicate removal was achieved upon importing references into Covidence. Results from grey literature, trial registry and conference abstracts were screened online (e.g. at web sites), or in Excel.

**Data extraction and management.** Data were extracted independently by two review authors and disagreements were resolved by discussion or a third reviewer. For any study reports written by EG, data were extracted by other members of the author team. Data extraction was undertaken in Excel using a data extraction form that had been piloted by multiple review authors. For each study, the form captured sample size, study location, clinical target, proportion of females, mean age, MBT, control conditions, time points assessed, intervention extensiveness (single-intervention session versus multiple-intervention sessions), delivery format (in-person versus recorded intervention), and main outcomes.

**Selection of studies.** Titles/abstracts and full-text were screened independently by two review authors; disagreements were resolved by discussion or a third reviewer. When we encountered studies written by the first author (EG), to prevent a conflict of interest, decisions for inclusion were made by other members of the author team. Screening was done with Covidence software (<https://www.covidence.org>).

**Assessment of RoB in included studies.** RoB (RoB) was assessed in Covidence by two independent reviewers, using the Cochrane RoB tool. Disagreements were resolved by discussion or a third reviewer. Any studies by EG were assessed by other members of the author team.

**MEDLINE search strategy**

*Ovid MEDLINE(R) Epub Ahead of Print, In-Process & Other Non-Indexed Citations, Ovid MEDLINE(R) Daily, Ovid MEDLINE and Versions(R) <1946 to March 21 2018>*

1 mind-body therapies/ or meditation/ or mental healing/ or relaxation therapy/ (10320)

2 (mind-body or meditation? or meditativ\$ or mindfulness).ti,ab,kw,kf. (9836)

3 (relaxation adj2 (exercise? or therap\$)).ti,ab,kw,kf. (1536)

4 mental\$ healing.ti,ab,kw,kf. (46)

5 psychophysiology/ or psychophysiolog\$.ti,ab,kw,kf. (15543)

6 breathing exercises/ (3089)

7 (breathing exercise? or (mindful\$ adj2 breath\$)).ti,ab,kw,kf. (1054)

8 aromatherapy/ (686)

9 (aromatherap\$ or aroma therap\$).ti,ab,kw,kf. (981)

10 virtual reality/ (189)

11 ((virtual or augmented) adj2 realit\$).ti,ab,kw,kf. (8183)

12 Music therapy/ (2978)

13 (music\$ adj2 therap\$).ti,ab,kw,kf. (2187)

14 Feedback, sensory/ (2290)

15 ((sensory or visual or sensorimotor? or audio or proprioceptiv\$) adj2 feedback?).ti,ab,kw,kf. (6364)

16 laughter therapy/ (179)

17 laugh\$.ti,ab,kw,kf. (2750)

18 Biofeedback, psychology/ (6843)

19 ((Biofeedback? or bio-feedback?) adj2 (mindful\$ or Psycholog\$ or psycho-physiolog\$)).ti,ab,kw,kf. (41)

20 (Myofeedback? or ((False or Bogus) adj2 Physiological Feedback)).ti,ab,kw,kf. (45)

21 hypnosis/ (8730)

22 ((hypnosis? adj4 (patient? or therap\$ or intervention? or pain or post-op\$ or postop\$ or preop\$ or pre-op\$ or instead or compared or versus or vs)) or hypnotiz\$ or hypnotis\$).ti,ab,kw,kf. (2566)

23 "imagery (psychotherapy)"/ (1528)

24 ((psychother\$ or therap\$ or exercise or guided) adj2 imagery).ti,ab,kw,kf. (823)

25 Cognitive therapy/ or "Acceptance and Commitment Therapy"/ or ((cognitive or behavio?r\$) adj2 therap\$).ti,ab,kw,kf. or "commit?ment and acceptance therap\$".ti,ab,kw,kf. (35740)

26 Complementary Therapies/ or alternative medicine.ti,ab,kw,kf. (19151)

27 or/1-26 [Mind Body Therapies] (123897)

28 analgesics, opioid/ or alfentanil/ or alphaprodine/ or buprenorphine/ or buprenorphine, naloxone drug combination/ or butorphanol/ or codeine/ or dextromoramide/ or dextropropoxyphene/ or dihydromorphine/ or diphenoxylate/ or "enkephalin, ala(2)-mephe(4)-gly(5)-"/ or "enkephalin, d-penicillamine (2,5)-"/ or ethylketocyclazocine/ or ethylmorphine/ or etorphine/ or fentanyl/ or hydrocodone/ or hydromorphone/ or levorphanol/ or meperidine/ or meptazinol/ or methadyl acetate/ or morphine/ or nalbuphine/ or opiate alkaloids/ or oxycodone/ or oxymorphone/ or pentazocine/ or phenazocine/ or phenoperidine/ or pirinitramide/ or promedol/ or sufentanil/ or tilidine/ or tramadol/ (91150)

29 opiate alkaloids/ or exp morphinans/ or noscapine/ or papaverine/ (81411)

30 (opioid? or opiate? or buprenorphin\$ or butorphanol? or codeine or dextromoramid? or dextropropoxyphen? or dihydrocodein\$ or dihydromorphin\$ or ethylmorphin\$ or etorphin\$ or fentanyl? or hydrocodon\$ or hydromorphon\$ or levorphanol\$ or meperidin\$ or morphin\$ or Nalbuphin\$ or oxycodon\$ or oxymorphon\$ or pentazocin\$ or phenazocin\$ or phenoperidin\$ or tilidin\$ or tramadol?).ti,ab,kw,kf. (144617)

31 or/28-30 [Opioid Analgesics] (180959)

32 exp Analgesia/ (40435)

33 analgesia?.ti,ab,kw,kf. (58504)

34 or/32-33 [Analgesia] (76798)

35 exp Pain/ or Pain Management/ (365941)

36 pain.ti,ab,kw,kf. (534833)

37 or/35-36 [Pain] (685044)

38 and/27,31 [Opioid Analgesics & Mindfulness] (1160)

39 and/27,37 [Pain & Mindfulness] (10599)

40 and/27,34 [Analgesia & Mindfulness] (1034)

41 (randomized controlled trial or controlled clinical trial).pt. or randomized.ab. or placebo.ab. or clinical trials as topic.sh. or randomly.ab. or trial.ti. (1138623)

42 exp animals/ not humans.sh. (4435061)

43 41 not 42 [Cochrane RCT Filter 6.4.d Sens/Precision Maximizing] (1048581)

44 (or/38-40) and 43 [RCT Results] (3225)

45 (systematic review or meta-analys\$ or metaanaly\$).ti. or cochrane.jw. (140764)

46 38 and 45 and 20\$.yr,dp,ep. [SR search on Mindfulness & Opioids] (46)

47 44 not 45 [RCT results excluding titles with systematic review or meta analysis in title] (2909)

| <b>eTable 1. Characteristics of Meditation Studies</b>                                                                                                                         |                |                                                                           |          |                  |                  |                                                   |                      |                                   |                        |
|--------------------------------------------------------------------------------------------------------------------------------------------------------------------------------|----------------|---------------------------------------------------------------------------|----------|------------------|------------------|---------------------------------------------------|----------------------|-----------------------------------|------------------------|
| <b>Author, year</b>                                                                                                                                                            | <b>Country</b> | <b>Clinical Target</b>                                                    | <b>N</b> | <b>Female, %</b> | <b>Age, Mean</b> | <b>Mind-Body Intervention(s)</b>                  | <b>Comparator(s)</b> | <b>Intervention Extensiveness</b> | <b>Delivery Format</b> |
| Dindo, 2018                                                                                                                                                                    | USA            | Orthopedic surgery                                                        | 76       | 6                | 63               | Acceptance and commitment therapy                 | Usual care           | Single                            | In-person              |
| Esmer, 2010                                                                                                                                                                    | USA            | Failed back surgery                                                       | 44       | 44               | 55               | Mindfulness-based Stress Reduction                | Waitlist             | Multiple                          | In-person              |
| Garland, 2014a, b; Garland, 2017                                                                                                                                               | USA            | Chronic pain and taking opioids daily or almost daily for 90 days         | 115      | 68               | 48               | Mindfulness-Oriented Recovery Enhancement         | Support group        | Multiple                          | In-person              |
| Garland, 2017                                                                                                                                                                  | USA            | Hospital inpatients reporting intolerable pain or inadequate pain control | 244      | 57               | 51               | 1. Mindfulness training<br>2. Hypnotic suggestion | Pain education       | Single                            | In-person              |
| Zgierska, 2016                                                                                                                                                                 | USA            | Back pain                                                                 | 35       | 80               | 52               | Mindfulness meditation + CBT                      | Usual care           | Multiple                          | In-person              |
| Abbreviation: N, sample size; CBT, Cognitive Behavioral Therapy. <b>Note:</b> For studies that had more than one MBT or comparator, each arm is denoted by a preceding number. |                |                                                                           |          |                  |                  |                                                   |                      |                                   |                        |

| <b>eTable 2. Findings of Meditation Studies</b>                                                                                                                                                                                                                                                                      |                                                                                                                                                 |                                              |                                                                                                                                                                                                                                                                                                             |
|----------------------------------------------------------------------------------------------------------------------------------------------------------------------------------------------------------------------------------------------------------------------------------------------------------------------|-------------------------------------------------------------------------------------------------------------------------------------------------|----------------------------------------------|-------------------------------------------------------------------------------------------------------------------------------------------------------------------------------------------------------------------------------------------------------------------------------------------------------------|
| <b>Author, year</b>                                                                                                                                                                                                                                                                                                  | <b>Main Outcomes</b>                                                                                                                            | <b>Time Points</b>                           | <b>Results</b>                                                                                                                                                                                                                                                                                              |
| Dindo, 2018                                                                                                                                                                                                                                                                                                          | Cessation of: pain, opioid use                                                                                                                  | Daily for 3 mos post-surgery                 | ACT achieved pain and opioid cessation sooner compared with usual care.                                                                                                                                                                                                                                     |
| Esmer, 2010                                                                                                                                                                                                                                                                                                          | VAS pain intensity<br>AML opioid use                                                                                                            | Baseline, 12 wks, 40 wks                     | Sig effects of MBSR compared with waitlist on pain intensity and opioid analgesic use.                                                                                                                                                                                                                      |
| Garland, 2014a, b<br>Garland, 2017                                                                                                                                                                                                                                                                                   | BPI pain severity and interference<br>NRS desire for opioids and cue-elicited craving<br>COMM opioid misuse<br>NRS EMA momentary pain intensity | Baseline, post-treatment, 3 mos              | Sig effects of MORE compared with control group at post-tx and 3 mo on pain severity, functional interference, and EMA momentary pain intensity. Sig effects of MORE at post-tx on desire for opioids, cue-elicited craving, and number of patients meeting opioid use disorder criteria (COMM) at post-tx. |
| Garland, 2017                                                                                                                                                                                                                                                                                                        | NRS pain intensity<br>NRS pain unpleasantness<br>NRS desire for opioids                                                                         | Pre-intervention, post-intervention          | Sig effects of mindfulness and hypnosis compared with education on pain intensity and pain unpleasantness. Sig effects of hypnosis compared with education on lower desire for opioids.                                                                                                                     |
| Zgierska, 2016                                                                                                                                                                                                                                                                                                       | BPI pain severity<br>Opioid dose (verified self-report)<br>Pain sensitivity to thermal stimuli                                                  | Baseline, 8 wks and 26 wks post-intervention | Sig effects of mindfulness compared with usual care on reductions in pain severity and thermal pain sensitivity. No other between-group effects observed.                                                                                                                                                   |
| Abbreviations: Sig, significant(ly); ACT, Acceptance and Commitment Therapy; VAS, visual analogue scale; AML, Analgesic Medication Log; MBSR, Mindfulness-based Stress Reduction; BPI, Brief Pain Inventory; NRS, numerical rating scale; COMM, Current Opioid Misuse Measure; EMA, Ecological momentary assessment. |                                                                                                                                                 |                                              |                                                                                                                                                                                                                                                                                                             |



| Author, year      | Country | Clinical Target                                                           | N   | Female, % | Age, Mean | Mind-Body Intervention(s)                         | Comparator(s)                                                                        | Session Extensiveness | Delivery Format |
|-------------------|---------|---------------------------------------------------------------------------|-----|-----------|-----------|---------------------------------------------------|--------------------------------------------------------------------------------------|-----------------------|-----------------|
| Ashton, 1997      | USA     | Cardiac surgery                                                           | 32  | 13        | 63        | Self-hypnosis                                     | Usual care                                                                           | Single                | In-person       |
| Akgul, 2016       | Turkey  | Cardiac surgery                                                           | 44  | 20        | 55        | Hypnosis                                          | Usual care                                                                           | Single                | In-person       |
| Askay, 2007       | USA     | Burn pain                                                                 | 46  | NR        | 37        | Hypnosis                                          | Attention Control                                                                    | Single                | In-person       |
| Enqvist, 1997     | Sweden  | Dental surgery                                                            | 69  | 52        | 28        | Hypnosis                                          | Usual care                                                                           | Single                | Recording       |
| Everett, 1993     | USA     | Burn pain                                                                 | 32  | 9         | 37        | 1. Hypnosis + placebo<br>2. Hypnosis + lorazepam  | 1. Psychological Intervention + placebo<br>2. Psychological intervention + lorazepam | Single                | In-person       |
| Faymonville, 1997 | Belgium | Elective plastic surgery                                                  | 60  | 87        | 35        | Hypnosis                                          | Stress reducing strategies                                                           | Single                | In-person       |
| Frenay, 2001      | Belgium | Burn pain                                                                 | 30  | 43        | 42        | Hypnosis                                          | Stress reduction                                                                     | Multiple              | In-person       |
| Garland, 2017     | USA     | Hospital inpatients reporting intolerable pain or inadequate pain control | 244 | 57        | 51        | 1. Hypnotic suggestion<br>2. Mindfulness training | Pain education                                                                       | Single                | In-person       |
| Ghoneim, 2000     | USA     | Dental surgery                                                            | 60  | 58        | 23        | Hypnosis                                          | Usual care                                                                           | Single                | Recording       |
| Joudi, 2016       | Iran    | Postoperative pain and analgesic use                                      | 120 | 86        | 43        | Hypnosis                                          | Usual care                                                                           | Single                | Recording       |

|                  |        |                                     |     |     |                 |                                  |                                                      |        |           |
|------------------|--------|-------------------------------------|-----|-----|-----------------|----------------------------------|------------------------------------------------------|--------|-----------|
| Lang, 1996       | USA    | Interventional radiology procedures | 30  | 0   | 67              | Hypnosis                         | Usual care                                           | Single | In-person |
| Lang, 2000       | USA    | Arterial, venous, and renal surgery | 241 | 53  | 56              | Hypnosis                         | 1. Structured attention<br>2. Usual care             | Single | In-person |
| Lang, 2008       | USA    | Percutaneous tumor treatment        | 201 | 63  | 50              | Hypnosis                         | 1. Empathic attention<br>2. Usual care               | Single | In-person |
| Mackey, 2010     | USA    | Outpatient third molar extraction   | 91  | 59  | 18-25 (no mean) | Hypnosis + music and IV sedation | Music + IV sedation                                  | Single | Recording |
| Mackey, 2018     | USA    | Outpatient third molar extraction   | 119 | NR  | 18-25 (no mean) | Hypnosis + music and IV sedation | Music + IV sedation                                  | Single | Recording |
| Marc, 2008       | Canada | Surgical abortion                   | 350 | 100 | 25              | Hypnosis                         | Usual care                                           | Single | In-person |
| Montgomery, 2007 | USA    | Breast surgery                      | 200 | 100 | 49              | Hypnosis                         | Attention control                                    | Single | In-person |
| Patterson, 1992  | USA    | Burn patients, wound debridement    | 30  | NR  | 34              | Hypnosis                         | 1. Attention control<br>2. Usual care                | Single | In-person |
| Patterson, 2010  | USA    | Hospitalized for traumatic injury   | 21  | 19  | 32              | Virtual reality hypnosis         | 1. Usual care<br>2. Virtual reality without hypnosis | Single | In-person |

|                                                                                                                                                                |           |                                                 |    |    |    |                               |                                                               |          |           |
|----------------------------------------------------------------------------------------------------------------------------------------------------------------|-----------|-------------------------------------------------|----|----|----|-------------------------------|---------------------------------------------------------------|----------|-----------|
| Surman, 1974                                                                                                                                                   | USA       | Cardiovascular surgery                          | 40 | 68 | 50 | Hypnosis                      | Usual care                                                    | Single   | In-person |
| Syrjala, 1992                                                                                                                                                  | USA       | Cancer pain (undergoing bone marrow transplant) | 45 | 19 | 33 | Hypnosis                      | 1. CBT coping skills<br>2. Therapist contact<br>3. Usual care | Multiple | In-person |
| Wang, 2015                                                                                                                                                     | China     | Lung cancer surgery                             | 60 | 42 | 54 | Hypnosis + relaxation + music | Usual care                                                    | Multiple | Recording |
| Wright, 2000                                                                                                                                                   | Australia | Burn pain                                       | 30 | 27 | 35 | Hypnosis                      | Usual care                                                    | Multiple | In-person |
| Abbreviations: N, sample size; NR, not reported. <b>Note:</b> For studies that had more than one MBT or comparator, each arm is denoted by a preceding number. |           |                                                 |    |    |    |                               |                                                               |          |           |

| <b>eTable 4. Findings of Hypnosis Studies</b> |                                                                          |                                                                                                                                    |                                                                                                                                                                                                           |
|-----------------------------------------------|--------------------------------------------------------------------------|------------------------------------------------------------------------------------------------------------------------------------|-----------------------------------------------------------------------------------------------------------------------------------------------------------------------------------------------------------|
| <b>Author, year</b>                           | <b>Main Outcomes</b>                                                     | <b>Time Points</b>                                                                                                                 | <b>Results</b>                                                                                                                                                                                            |
| Ashton, 1997                                  | Post-operative pain medication<br>Intraoperative pharmacological support | Followed for five days post-op                                                                                                     | Significantly more pain medication use in self-hypnosis compared with usual care, due to a subset of participants who did not comply with hypnosis practice instructions. No other between group effects. |
| Akgul, 2016                                   | VAS pain intensity<br>Post-op opioid dose                                | Anxiety and Depression: 3-5 days pre-op, 1 day pre-op.<br>Pain intensity: pre-op, every two hrs post-op for 12 hrs, 24 hrs post-op | Sig effect of hypnosis compared with usual care, with lower post-op opioid dose.                                                                                                                          |
| Askay, 2007                                   | MPQ pain intensity<br>GRS pain intensity                                 | Before and after wound dressing                                                                                                    | Sig effect of hypnosis compared with control on pain (MPQ).                                                                                                                                               |
| Enqvist, 1997                                 | VAS pain intensity<br>Opioid dose                                        | Pre- and post-op                                                                                                                   | Sig less post-op opioid dose in hypnosis group compared with usual care. No between-group effect on post-op pain.                                                                                         |
| Everett, 1993                                 | VAS pain intensity<br>Morphine equivalents                               | Before and after wound dressing                                                                                                    | No between-group effects on pain intensity or opioid dose.                                                                                                                                                |
| Faymonville, 1997                             | VAS pain<br>Opioid use (alfentanil ug/kg)                                | Pre-, intra- and post-operative                                                                                                    | Sig lower intra-op requirements for opioids in hypnosis compared with stress reduction. Intra- and post-op pain sig lower in hypnosis.                                                                    |
| Frenay, 2001                                  | VAS pain intensity                                                       | Days 1, 3, 5, 7, 8, 10, 12, and 14                                                                                                 | No between-group effects on pain.                                                                                                                                                                         |
| Garland, 2017                                 | NRS pain intensity<br>NRS pain unpleasantness<br>NRS desire for opioids  | Pre- and post-intervention                                                                                                         | Sig improvements in pain intensity and pain unpleasantness, for mindfulness and hypnosis compared with education. Sig effects of hypnosis compared with education on lower desire for opioids.            |

|               |                                                                 |                                                                                                                                                                   |                                                                                                                                                                         |
|---------------|-----------------------------------------------------------------|-------------------------------------------------------------------------------------------------------------------------------------------------------------------|-------------------------------------------------------------------------------------------------------------------------------------------------------------------------|
| Ghoneim, 2000 | VAS pain intensity<br>Opioid dose                               | Baseline, immediately post-op,<br>post-op days 1-3, 1 wk post-op                                                                                                  | No between-group differences.                                                                                                                                           |
| Joudi, 2016   | VAS pain intensity<br>Narcotic analgesia dose                   | Post-op hrs 0, 2, 6, 12, 24                                                                                                                                       | Sig lower pain in hypnosis compared with usual care at all time points. Sig lower narcotic analgesia dose in hypnosis compared with usual care.                         |
| Lang, 1996    | NRS pain intensity<br>Intraoperative opioid +<br>sedative units | Baseline, once per 40 minute<br>interval during surgery                                                                                                           | Sig less maximal pain and less total medication use for hypnosis compared with control.                                                                                 |
| Lang, 2000    | NRS pain intensity<br>Intraoperative opioid +<br>sedative units | Up to 13 fifteen-minute intervals<br>during surgery                                                                                                               | Sig less pain in hypnosis compared with structured attention and usual care. Sig less medication use in hypnosis and structured attention compared with usual care.     |
| Lang, 2008    | NRS pain intensity<br>Intraoperative opioid +<br>sedative units | Up to 10 fifteen-minute intervals<br>during procedure                                                                                                             | Sig less pain in hypnosis compared with controls from 15 to 45 minutes into the procedure. Sig less medication use during procedure in hypnosis compared with controls. |
| Mackey, 2010  | NRS pain intensity<br>Analgesic used 24 hrs<br>post-op          | Post-operative                                                                                                                                                    | Sig reduced postoperative pain and postoperative opioids in hypnosis compared with control.                                                                             |
| Mackey, 2018  | NRS pain intensity<br>Analgesic used 24 hrs<br>post-op          | Post-operative                                                                                                                                                    | Sig reduced postoperative pain and postoperative opioids in hypnosis compared with control.                                                                             |
| Marc, 2008    | VAS pain intensity<br>Any med use during<br>surgery (Yes/No)    | (T1) pre-randomization, (T2) start of<br>procedure (pelvic exam), (T3) within<br>1 min of first attempt suction<br>evacuation, (T4) within 1 mo post-<br>surgery. | Sig less likely to use pain medication in hypnosis compared with usual care. Statistical equivalence (noninferiority) for pain at T3.                                   |

|                  |                                                                                                                     |                                                                                                                                                                                     |                                                                                                                                                                                                                                                                            |
|------------------|---------------------------------------------------------------------------------------------------------------------|-------------------------------------------------------------------------------------------------------------------------------------------------------------------------------------|----------------------------------------------------------------------------------------------------------------------------------------------------------------------------------------------------------------------------------------------------------------------------|
| Montgomery, 2007 | VAS pain intensity<br>VAS pain unpleasantness<br>Intra-operative fentanyl<br>Post-operative acetaminophen/oxycodone | Post-operative                                                                                                                                                                      | Sig less post-surgical pain and pain unpleasantness in hypnosis compared with attention control. No between-group effects on medication use.                                                                                                                               |
| Patterson, 1992  | VAS pain intensity<br>Morphine equivalent opioid dose                                                               | Pain: during wound care on Day 1 (pre-intervention) and Day 2 (post-intervention)                                                                                                   | Sig reduction in pain from pre- to post-intervention in hypnosis only. Sig lower post-intervention pain rating in hypnosis compared with control. No between-group or time effect for morphine equivalents.                                                                |
| Patterson, 2010  | GRS pain intensity<br>GRS pain unpleasantness                                                                       | Immediately pre- study intervention, 1 hour post-intervention, 8 hours post-intervention                                                                                            | Sig effects of VRH compared with control (usual care combined with VR distraction) on pain intensity and unpleasantness. Sig increased pain scores in control group.                                                                                                       |
| Surman, 1974     | NRS pain (0-3 scale)<br>Medication requirements (analgesics, tranquilizers, hypnotic sedatives)                     | Pain: Pre-op, intra-op, post-op days 1-5.<br>Medication: Post-op days 1-10                                                                                                          | No between-group effects on any outcome.                                                                                                                                                                                                                                   |
| Syrjala, 1992    | VAS pain intensity<br>Morphine equivalent dose                                                                      | Pain: Daily in hospital until 20 days post-transplant.                                                                                                                              | Sig lower pain intensity in hypnosis compared with CBT and usual care. No between-group effects on opioid dose.                                                                                                                                                            |
| Wang, 2015       | VAS pain intensity<br>Sufentanil total dose and number of uses                                                      | 4, 8, 12, 16, 20, and 24 hrs post-op                                                                                                                                                | Sig lower pain intensity, Sufentanil total dose and Sufentanil use frequency in hypnosis compared with usual care at each time point.                                                                                                                                      |
| Wright, 2000     | NRS pain intensity<br>NRS pain unpleasantness<br>Opioid dose                                                        | Pain: Baseline, 5-minutes before first and second burn treatment<br>Opioid dose: 24-hr baseline interval during burn tx (pre-intervention), and during tx 1 and tx 2 (intervention) | Sig effect of hypnosis compared with usual care on pain unpleasantness with reduction in pain unpleasantness from baseline to tx 1 and tx 1 to tx 2. No between-group effects on pain intensity. Sig reduction in opioid consumption in hypnosis compared with usual care. |

Abbreviations: Sig, significant(ly); VAS, Visual Analogue Scale; MPQ, McGill Pain Questionnaire; GRS, Graphic Rating Scale; VRH, Virtual Reality Hypnosis; NRS, Numerical Rating Scale.

| <b>eTable 5. Characteristics of Relaxation Studies</b> |                |                                    |          |                  |                  |                                                         |                                  |                              |                        |
|--------------------------------------------------------|----------------|------------------------------------|----------|------------------|------------------|---------------------------------------------------------|----------------------------------|------------------------------|------------------------|
| <b>Author, year</b>                                    | <b>Country</b> | <b>Clinical Target</b>             | <b>N</b> | <b>Female, %</b> | <b>Age, Mean</b> | <b>Mind-Body Intervention(s)</b>                        | <b>Comparator(s)</b>             | <b>Session Extensiveness</b> | <b>Delivery Format</b> |
| Anderson, 2006                                         | USA            | Cancer pain                        | 57       | 79               | 52               | 1. Progressive muscle relaxation<br>2. Positive imagery | 1. Distraction<br>2. Waitlist    | Multiple                     | Recording              |
| Gavin, 2006                                            | USA            | Spinal surgery                     | 49       | 71               | 56               | Relaxation                                              | Usual care                       | Single                       | In-person              |
| Good, 1995                                             | USA            | Abdominal surgery                  | 84       | 70               | 46               | 1. Relaxation<br>2. Relaxation + music                  | 1. Music<br>2. Usual care        | Multiple                     | Recording              |
| Good, 1999                                             | USA            | Abdominal surgery                  | 500      | 83               | 45               | 1. Relaxation<br>2. Relaxation + music                  | 1. Music<br>2. Attention control | Multiple                     | Recording              |
| Good, 2010                                             | USA            | Abdominal surgery                  | 517      | 68               | 49               | Relaxation + music                                      | Patient teaching                 | Single                       | Recording              |
| Haase, 2005                                            | Germany        | Colorectal cancer surgery          | 60       | 38               | 65               | 1. Guided Imagery<br>2. Relaxation                      | Usual care                       | Multiple                     | Recording              |
| Konstantatos, 2009                                     | Australia      | Burn wound dressing changes        | 86       | NR               | 39               | Virtual reality relaxation                              | Usual care                       | Single                       | Recording              |
| Kwekkeboom et al, 2008                                 | USA            | Cancer pain during hospitalization | 40       | 55               | 49               | 1. Progressive muscle relaxation<br>2. Guided imagery   | Information                      | Multiple                     | Recording              |
| Mandle, 1990                                           | USA            | Femoral angiography                | 45       | NR               | NR               | Relaxation                                              | 1. Music tape<br>2. Blank tape   | Single                       | Recording              |



|                                                                                                                                                                                                  |           |                                               |     |    |    |                                                                        |                                       |          |                       |
|--------------------------------------------------------------------------------------------------------------------------------------------------------------------------------------------------|-----------|-----------------------------------------------|-----|----|----|------------------------------------------------------------------------|---------------------------------------|----------|-----------------------|
| Manyande, 1998                                                                                                                                                                                   | UK        | Major abdominal or abdominal-perineal surgery | 118 | 51 | 42 | Relaxation                                                             | Informational tape                    | Single   | Recording             |
| Rejeh, 2013                                                                                                                                                                                      | Iran      | Elective abdominal surgery                    | 124 | 74 | 76 | Systematic relaxation                                                  | Usual care                            | Single   | Recording             |
| Roykulchareon 2004                                                                                                                                                                               | Thailand  | Abdominal surgery                             | 102 | 82 | 42 | Systematic relaxation                                                  | Lying still in bed                    | Single   | In-person             |
| Sloman, 1994                                                                                                                                                                                     | Australia | Cancer pain                                   | 67  | 28 | 64 | 1. Relaxation (in-person)<br>2. Relaxation (tape)                      | Usual care                            | Multiple | In-person + recording |
| Syrjala, 1995                                                                                                                                                                                    | USA       | Cancer pain                                   | 94  | 44 | 36 | 1. Relaxation + Imagery<br>2. Relaxation + Imagery + CBT coping skills | 1. Therapist contact<br>2. Usual care | Multiple | In-person             |
| Wang, 2008                                                                                                                                                                                       | China     | Postembolization pain                         | 262 | 29 | 53 | Relaxation + psychotherapy                                             | Usual care                            | NR       | In-person             |
| Wilson, 1981                                                                                                                                                                                     | USA       | Surgery, cholecystectomy and hysterectomy     | 70  | NR | 42 | 1. Relaxation<br>2. Relaxation + Information                           | 1. Information<br>2. Usual care       | Single   | Recording             |
| Abbreviations: N, sample size; NR, not reported; CBT, Cognitive Behavioral Therapy. <b>Note:</b> For studies that had more than one MBT or comparator, each arm is denoted by a preceding number |           |                                               |     |    |    |                                                                        |                                       |          |                       |

| <b>eTable 6. Findings of Relaxation Studies</b> |                                                        |                                     |                                                                                                                                                                    |
|-------------------------------------------------|--------------------------------------------------------|-------------------------------------|--------------------------------------------------------------------------------------------------------------------------------------------------------------------|
| Anderson, 2006                                  | BPI pain intensity                                     | Baseline, 2-3 wks, 4-5 wks, 8-9 wks | No between-group effects on any outcome.                                                                                                                           |
| Gavin, 2006                                     | NRS pain intensity<br>Opioid dose                      | Post-op day 1 and 2                 | Sig greater decreases in pain in relaxation compared with usual care from Day 1 to Day 2. Sig higher opioid dose on Day 1 for relaxation compared with usual care. |
| Good, 1995                                      | MPQ pain intensity<br>Opioid dose                      | Baseline, post-op                   | No between-group differences on any outcome.                                                                                                                       |
| Good, 1999                                      | VAS pain sensation<br>VAS pain distress                | Baseline, post-op at rest           | Sig less pain sensation and distress in the relaxation + music, relaxation only, and music only groups compared with attention control.                            |
| Good, 2010                                      | VAS pain sensation<br>VAS pain distress<br>Opioid dose | Baseline, post-op                   | Sig effects on pain sensation and distress for relaxation + music compared with patient teaching. No between-group effects on opioid dose.                         |
| Haase, 2005                                     | VAS pain<br>Opioid use                                 | Postop day 1 to 4                   | No between-group effects on any outcome.                                                                                                                           |
| Konstantatos, 2009                              | VAS pain intensity<br>Opioid dose (morphine)           | Pre- and post-dressing change       | Sig greater pain during and after dressing changes for virtual reality relaxation compared with usual care. No between-group effects on opioid dose.               |
| Kwekkeboom et al, 2008                          | NRS pain intensity<br>NRS pain-related distress        | Pre- and post-intervention          | Sig pre-post reductions in pain and pain-related in distress in the PMR and imagery groups compared with information.                                              |

|                    |                                                                                                                               |                                                                                                                        |                                                                                                                                                                                                                                                                                                                                                                                                                                                                                       |
|--------------------|-------------------------------------------------------------------------------------------------------------------------------|------------------------------------------------------------------------------------------------------------------------|---------------------------------------------------------------------------------------------------------------------------------------------------------------------------------------------------------------------------------------------------------------------------------------------------------------------------------------------------------------------------------------------------------------------------------------------------------------------------------------|
| Mandle, 1990       | MPQ pain rating index<br>MPQ pain intensity<br>Fentanyl citrate use<br>NRS nurse-assessed pain                                | Pre and post-op (STAI), post-op (MPQ, nurse-rated anxiety and pain during procedure)                                   | Sig effects of relaxation compared with control groups on pain rating index and pain intensity (MPQ), nurse-assessed pain, and Fentanyl use.                                                                                                                                                                                                                                                                                                                                          |
| Manyande, 1998     | VAS pain intensity<br>VAS pain distress<br>Analgesic use                                                                      | Pre-op, post-op days 1-7                                                                                               | Pain intensity and distress declined sig faster in control grp. Lower pain intensity in relaxation grp through post-op period. Sig less pain distress in relaxation early in post-op. Analgesic use: Sig more relaxation patients received recovery analgesia; fewer in relaxation grp received i.m analgesia on surgical ward 1st day; fewer in relaxation grp received i.v. pumps post-op. No between-group effects on receiving intra-op i.m. analgesia or post-op oral analgesia. |
| Rejeh, 2013        | VAS pain intensity<br>Opioid dose and use                                                                                     | Pre-intervention, after 15-min recovery from initial ambulation, 6 hours post-intervention, 12 hours post-intervention | Sig effect of relaxation compared with usual care on pain intensity, mg morphine equivalents received w/in 6 hours after intervention, and # patients receiving opioids after intervention                                                                                                                                                                                                                                                                                            |
| Roykulchareon 2004 | VAS pain intensity<br>VAS pain distress<br>Opioid dose                                                                        | Baseline, post-ambulation following surgery, opioid dose 6 hours after intervention                                    | Sig less pain and distress in relaxation compared with control. No between-group effects on opioid use.                                                                                                                                                                                                                                                                                                                                                                               |
| Sloman, 1994       | SF-MPQ pain sensation<br>SF-MPQ pain affect<br>SF-MPQ present pain intensity<br>VAS overall pain intensity<br>Morphine intake | Approximately 3 weeks after hospital discharge                                                                         | Sig reduced present pain intensity and overall pain severity in both relaxation groups compared with usual care. Significantly reduced pain sensation in in-person relaxation only. No between-group effects on pain affect and morphine intake.                                                                                                                                                                                                                                      |
| Syrjala, 1995      | VAS pain intensity                                                                                                            | Averages for days -10 to -1, 0-5, 6-16, 17-22                                                                          | Sig reduction in pain in the relaxation groups compared with the control groups, with no difference between the two relaxation groups.                                                                                                                                                                                                                                                                                                                                                |

|                                                                                                                                                                                                        |                                                  |                                                    |                                                                                                   |
|--------------------------------------------------------------------------------------------------------------------------------------------------------------------------------------------------------|--------------------------------------------------|----------------------------------------------------|---------------------------------------------------------------------------------------------------|
| Wang, 2008                                                                                                                                                                                             | NRS pain intensity                               | Pre-op, before and after analgesia, post-treatment | Sig reduction in pain score post-analgesia in relaxation + psychotherapy compared with usual care |
| Wilson, 1981                                                                                                                                                                                           | Number of opioid injections<br>NRS pain distress | Daily in hospital post-surgery                     | Sig less opioid injections and pain distress in relaxation groups compared with control groups.   |
| Abbreviations: Sig, significant(ly); BPI, Brief Pain Inventory; NRS, Numerical Rating Scale; MPQ, McGill Pain Questionnaire; VAS, Visual analogue scale; SF-MPQ, Short-form McGill Pain Questionnaire. |                                                  |                                                    |                                                                                                   |

| <b>Author, year</b> | <b>Country</b> | <b>Clinical Target</b>                       | <b>N</b> | <b>Female, %</b> | <b>Age, Mean</b> | <b>Mind-Body Intervention(s)</b>                        | <b>Comparator(s)</b>          | <b>Session Extensiveness</b> | <b>Delivery Formats</b> |
|---------------------|----------------|----------------------------------------------|----------|------------------|------------------|---------------------------------------------------------|-------------------------------|------------------------------|-------------------------|
| Anderson, 2006      | USA            | Cancer pain                                  | 57       | 79               | 52               | 1. Progressive muscle relaxation<br>2. Positive imagery | 1. Distraction<br>2. Waitlist | Single                       | In-person               |
| Antall, 2004        | USA            | Joint replacement surgery                    | 13       | 0                | >55 (no mean)    | Guided imagery                                          | Usual care                    | Single                       | Recording               |
| Forward, 2015       | USA            | Joint replacement surgery                    | 225      | 66               | 38-90 (no mean)  | 1. Guided imagery                                       | 1. Massage<br>2. Usual care   | Multiple                     | In-person               |
| Gonzales, 2010      | USA            | Head and neck surgical procedures            | 44       | 41               | 35               | Guided imagery                                          | Usual care                    | Multiple                     | Recording               |
| Haase, 2005         | Germany        | Colorectal cancer surgery                    | 60       | 38               | 65               | 1. Guided imagery<br>2. Relaxation                      | Usual care                    | Multiple                     | Recording               |
| Kwekkeboom, 1999    | USA            | Surgery for breast or gynecologic malignancy | 75       | 100              | 51               | Guided imagery                                          | Usual care                    | Single                       | Recording               |
| Kwekkeboom, 2008    | USA            | Cancer pain during hospitalization           | 40       | 55               | 49               | 1. Progressive muscle relaxation<br>2. Guided imagery   | Information                   | Multiple                     | Recording               |
| Pijl, 2016          | Netherlands    | Laparoscopic cholecystectomy for gall stones | 140      | 76               | 51               | Guided imagery                                          | Usual care                    | Multiple                     | Recording               |
| Tusek, 1997         | USA            | Colorectal surgery                           | 130      | NR               | NR               | Guided imagery + music                                  | Usual care                    | Multiple                     | Recording               |

Abbreviations: N, sample size; NR, not reported. **Note:** For studies that had more than one MBT or comparator, each arm is denoted by a preceding number.

**eTable 8.** Findings of Guided Imagery Studies

| Author, year                                                                                                                                                                | Main Outcomes                                                    | Time Points                                                                                       | Results                                                                                                                                     |
|-----------------------------------------------------------------------------------------------------------------------------------------------------------------------------|------------------------------------------------------------------|---------------------------------------------------------------------------------------------------|---------------------------------------------------------------------------------------------------------------------------------------------|
| Anderson, 2006                                                                                                                                                              | BPI pain intensity                                               | Baseline, 2-3 wks, 4-5 wks, 8-9 wks                                                               | No between-group effects on any outcome.                                                                                                    |
| Antall, 2004                                                                                                                                                                | NRS pain intensity<br>Opioid dose                                | Post-op                                                                                           | No between-group effects on any outcome.                                                                                                    |
| Forward, 2015                                                                                                                                                               | NRS pain intensity<br>Opioid dose                                | Pre-op day 0, post-op days 0, 1, 2                                                                | Sig greater decreases in pain for guided imagery and massage than for usual care by post-op day 1. No between-group effects on opioid dose. |
| Gonzales, 2010                                                                                                                                                              | vVAS pain intensity<br>Opioid use                                | Pre-op, 1 hour post-op, 2 hours post-op                                                           | Sig lower pain intensity at 2 hours post-op in guided imagery compared with usual care. No between-group effects on opioid use.             |
| Haase, 2005                                                                                                                                                                 | VAS pain intensity<br>Opioid use                                 | Postop day 1 to 4                                                                                 | No between-group effects on any outcome.                                                                                                    |
| Kwekkeboom, 1999                                                                                                                                                            | VAS pain intensity<br>VAS pain distress<br>BPI pain interference | Immediately pre-intervention, during intervention, post-intervention, 5 minutes post-intervention | No between-group effects on any outcome.                                                                                                    |
| Kwekkeboom, 2008                                                                                                                                                            | NRS pain intensity<br>NRS pain-related distress                  | Pre- and post-intervention                                                                        | Sig pre-post reductions in pain and pain-related distress in the PMR and imagery groups compared with information.                          |
| Pijl, 2016                                                                                                                                                                  | VAS pain intensity<br>Analgesic use (morphine)                   | Post-op (morphine use); pre-op and post-op (pain and anxiety)                                     | No between-group effects on any outcome.                                                                                                    |
| Tusek, 1997                                                                                                                                                                 | LAS pain intensity<br>Opioid requirements                        | Baseline, pre-op, 6 post-op days                                                                  | Sig reduction in pain scores, preoperative anxiety, and opioid requirements in imagery compared with usual care.                            |
| Abbreviations: BPI, Brief Pain Inventory; NRS, Numerical rating scale; vVAS, vertical Visual Analogue Scale; VAS, Visual Analogue Scale; LAS, Linear analogue scale, 0-100. |                                                                  |                                                                                                   |                                                                                                                                             |

**eTable 9.** Characteristics of Therapeutic Suggestion Studies

| Author, year    | Country | Clinical Target                                        | N   | Female, % | Age, Mean | Mind-Body Intervention(s)      | Comparator(s)                   | Session Extensiveness | Delivery Format |
|-----------------|---------|--------------------------------------------------------|-----|-----------|-----------|--------------------------------|---------------------------------|-----------------------|-----------------|
| Block, 1991     | USA     | Heterogeneous sample of anesthetized surgical patients | 209 | 90        | 35        | Therapeutic suggestion         | Blank tape                      | Single                | Recording       |
| Laan, 1996      | USA     | Gynecologic surgery                                    | 60  | 100       | 41        | Therapeutic suggestion         | Story control                   | Single                | Recording       |
| Melzack, 1996   | Canada  | Surgery, cholecystectomy and hysterectomy              | 20  | 55        | 51        | Positive suggestion + music    | Scientific information + music  | Single                | Recording       |
| McLintock, 1990 | UK      | Hysterectomy surgery                                   | 63  | 100       | 41        | Positive suggestion            | Blank tapes                     | Single                | Recording       |
| Nilsson, 2001   | Sweden  | Abdominal surgery                                      | 90  | 100       | 50        | Therapeutic suggestion + music | 1. Music<br>2. Operating sounds | Single                | Recording       |
| Nilsson, 2003   | Sweden  | Varicose vein or open inguinal hernia repair surgery   | 182 | 27        | 52        | Therapeutic suggestion + music | 1. Music alone<br>2. Blank tape | Single                | Recording       |

**Note:** For studies that had more than one MBT or comparator, each arm is denoted by a preceding number



| <b>eTable 10. Findings of Therapeutic Suggestion Studies</b>               |                                                                           |                                                                                                                                         |                                                                                                                                          |
|----------------------------------------------------------------------------|---------------------------------------------------------------------------|-----------------------------------------------------------------------------------------------------------------------------------------|------------------------------------------------------------------------------------------------------------------------------------------|
| <b>Author, year</b>                                                        | <b>Main Outcomes</b>                                                      | <b>Time Points</b>                                                                                                                      | <b>Results</b>                                                                                                                           |
| Block, 1991                                                                | VAS pain intensity<br>Opioid use                                          | Every 2 hrs post-op day 0-1, every 4 hrs subsequent hospital days (pain); Every 24 hrs hospital days (opioids); Post-op day 3 (anxiety) | Sig decreases in opioid dose on 8th postoperative day in suggestion compared with blank tape. No other between-group differences.        |
| Laan, 1996                                                                 | VAS pain intensity<br>Opioid dose                                         | 6, 12, 18, and 24 hrs after surgery                                                                                                     | No between-group effects on any outcome.                                                                                                 |
| Melzack, 1996                                                              | VAS pain intensity<br>MPQ pain intensity<br>Drug intake                   | Post-op days 1, 2, 3, and 4                                                                                                             | No between-group effects on any outcome.                                                                                                 |
| McLintock, 1990                                                            | VAS pain intensity<br>Morphine use                                        | 0, 6, 12, 18, and 24 hrs (pain); 0-24 hours post-op (morphine use)                                                                      | Suggestion group used sig less morphine compared with control. No between-group effects on pain.                                         |
| Nilsson, 2001                                                              | VAS pain intensity<br>VAS pain unpleasantness<br>Cumulative morphine (mg) | Every hr for first 24 hours post-op, then every 3 hrs post-op                                                                           | Sig less opioid use in music + suggestion relative to control groups; Music only reduced pain sig more than operating sounds.            |
| Nilsson, 2003                                                              | VAS pain intensity<br>Morphine (mg)                                       | Pre and post (STAI and well-being) Post only (morphine and pain intensity)                                                              | Suggestion + music and music only had sig lower pain intensity than blank tape at post-op. No between-group effects on post-op morphine. |
| Abbreviations: VAS, Visual analogue scale; MPQ, McGill Pain Questionnaire. |                                                                           |                                                                                                                                         |                                                                                                                                          |

**eTable 11.** Characteristics of Cognitive Behavioral Therapy Studies

| Author, year  | Country | Clinical Target                                                                         | N                      | Female, %        | Age, Mean        | Mind-Body Therapy(ies)                                                 | Comparator(s)                         | Intervention Extensiveness | Delivery Format             |
|---------------|---------|-----------------------------------------------------------------------------------------|------------------------|------------------|------------------|------------------------------------------------------------------------|---------------------------------------|----------------------------|-----------------------------|
| Jamison, 2010 | USA     | Chronic back/neck pain + history of or high risk for prescription opioid misuse         | 62                     | 44               | 48               | Cognitive behavioral substance misuse counseling                       | Usual care                            | Multiple                   | In-person                   |
| Kroenke, 2009 | USA     | Comorbid chronic musculoskeletal pain and depression (opioid users analyzed separately) | 250 (134 opioid users) | 53 (full sample) | 56 (full sample) | Pain self-management                                                   | Usual care                            | Multiple                   | In-person                   |
| Naylor, 2010  | USA     | Chronic musculoskeletal pain (opioid use analyzed separately)                           | 51 (32 opioid users)   | 84 (full sample) | 46 (full sample) | Group CBT followed by Therapeutic Interactive Voice Response           | Group CBT followed by usual care      | Multiple                   | In-person + recording       |
| Rolving, 2016 | Denmark | Undergoing lumbar spinal fusion due to degenerative spinal disorders                    | 90                     | 57               | 50               | Pre-operative CBT                                                      | Usual care                            | Multiple                   | In-person                   |
| Syrjala, 1992 | USA     | Cancer pain (undergoing bone marrow transplant)                                         | 45                     | 19               | 33               | 1. CBT coping skills<br>2. Hypnosis                                    | 1. Therapist contact<br>2. Usual care | Multiple                   | In-person                   |
| Syrjala, 1995 | USA     | Cancer pain                                                                             | 94                     | 44               | 36               | 1. Relaxation + Imagery<br>2. Relaxation + Imagery + CBT coping skills | 1. Therapist contact<br>2. Usual care | Multiple                   | In-person                   |
| Wilson, 2016  | USA     | Chronic noncancer pain + prescribed opioids                                             | 92                     | 78               | 49               | Internet-based pain self-management                                    | Usual care                            | Multiple                   | Recording (online self-led) |

Abbreviations: N, sample size; CBT, Cognitive Behavioral Therapy. **Note:** For studies that had more than one MBT or comparator, each arm is denoted by a preceding number.

**eTable 12.** Findings of Cognitive Behavioral Therapy Studies

| <b>Author, year</b> | <b>Main Outcomes</b>                                                                                              | <b>Time Points</b>                                                                                          | <b>Results</b>                                                                                                                                                                                                                                                                                                                          |
|---------------------|-------------------------------------------------------------------------------------------------------------------|-------------------------------------------------------------------------------------------------------------|-----------------------------------------------------------------------------------------------------------------------------------------------------------------------------------------------------------------------------------------------------------------------------------------------------------------------------------------|
| Jamison, 2010       | BPI pain intensity<br>PDI pain disability<br>COMM opioid misuse<br>Opioid compliance checklist<br>DMI drug misuse | Baseline, monthly for 6 months (pain intensity), 6 months                                                   | No between-group differences on pain disability or pain interference. Sig effects of intervention compared with usual care on Drug Misuse Index. Sig lower average pain intensity over 6 month study period in intervention group compared with usual care.                                                                             |
| Kroenke, 2009       | Opioid use from electronic medical record                                                                         | 12-month study period                                                                                       | No sig between group difference in amount of opioid use.                                                                                                                                                                                                                                                                                |
| Naylor, 2010        | Self-reported opioid use, verified with electronic medical record or psychiatrist interview.                      | Baseline, post-CBT (11 wks), 4 months post-CBT (completion of TIVR), 8 months post-CBT                      | Sig lower mean opioid dose in experimental compared with control group at 4 and 8 months. Sig within-group decrease in opioid dose in experimental vs. sig increase in opioid dose in control group at 8 months.                                                                                                                        |
| Rolving, 2016       | NRS pain intensity<br>CAS mobility<br>Opioid use beyond standard protocol from medical record                     | NRS: post-op days 1-7;<br>CAS: post-op days 1-3);<br>opioids: post-op hospitalization                       | No sig between-group differences in pain intensity. Sig between-group differences in post-op mobility with CBT group performing better. Sig between-group difference, with lower opioid analgesic use in CBT group on post-op day 2 only.                                                                                               |
| Syrjala, 1992       | VAS pain intensity<br>Morphine equivalent dose                                                                    | Pain: Daily in hospital until 20 days post-transplant.                                                      | Sig lower pain intensity in hypnosis compared with CBT and usual care. No between-group effects on opioid dose.                                                                                                                                                                                                                         |
| Syrjala, 1995       | VAS pain intensity                                                                                                | Averages for days -10 to -1, 0-5, 6-16, 17-22                                                               | Sig reduction in pain in the mind-body intervention groups compared with the control groups, with no difference between the two mind-body intervention groups.                                                                                                                                                                          |
| Wilson, 2016        | BPI pain intensity and interference<br>COMM opioid misuse<br>Self-reported opioid use                             | BPI: Baseline, 2 wks, 4 wks, 6 wks, 8 wks, 6 months;<br>COMM: Bsl, 8 wks, 6 mos<br>Opioids: Baseline, 8 wks | No sig between-group differences in pain intensity or interference. Sig between-group difference on opioid misuse, with greater decreases in the intervention vs. usual care group. Sig between-group difference in number of participants decreasing or stopping opioid use, with more in intervention compared with usual care group. |

Abbreviations: Sig, significant(ly); BPI, Brief Pain Inventory; PDI, Pain Disability Index; COMM, Current Opioid Misuse Measure; DMI, Drug Misuse Index; MPQ, McGill Pain Questionnaire; TOPS, Total Pain Experience Scale; TIVR, Therapeutic Interactive Voice Response; NRS, numerical rating scale; CAS, Cumulated Ambulation Score.

**eFigure 1.** Meta-analysis of Meditation Studies on Pain Outcomes

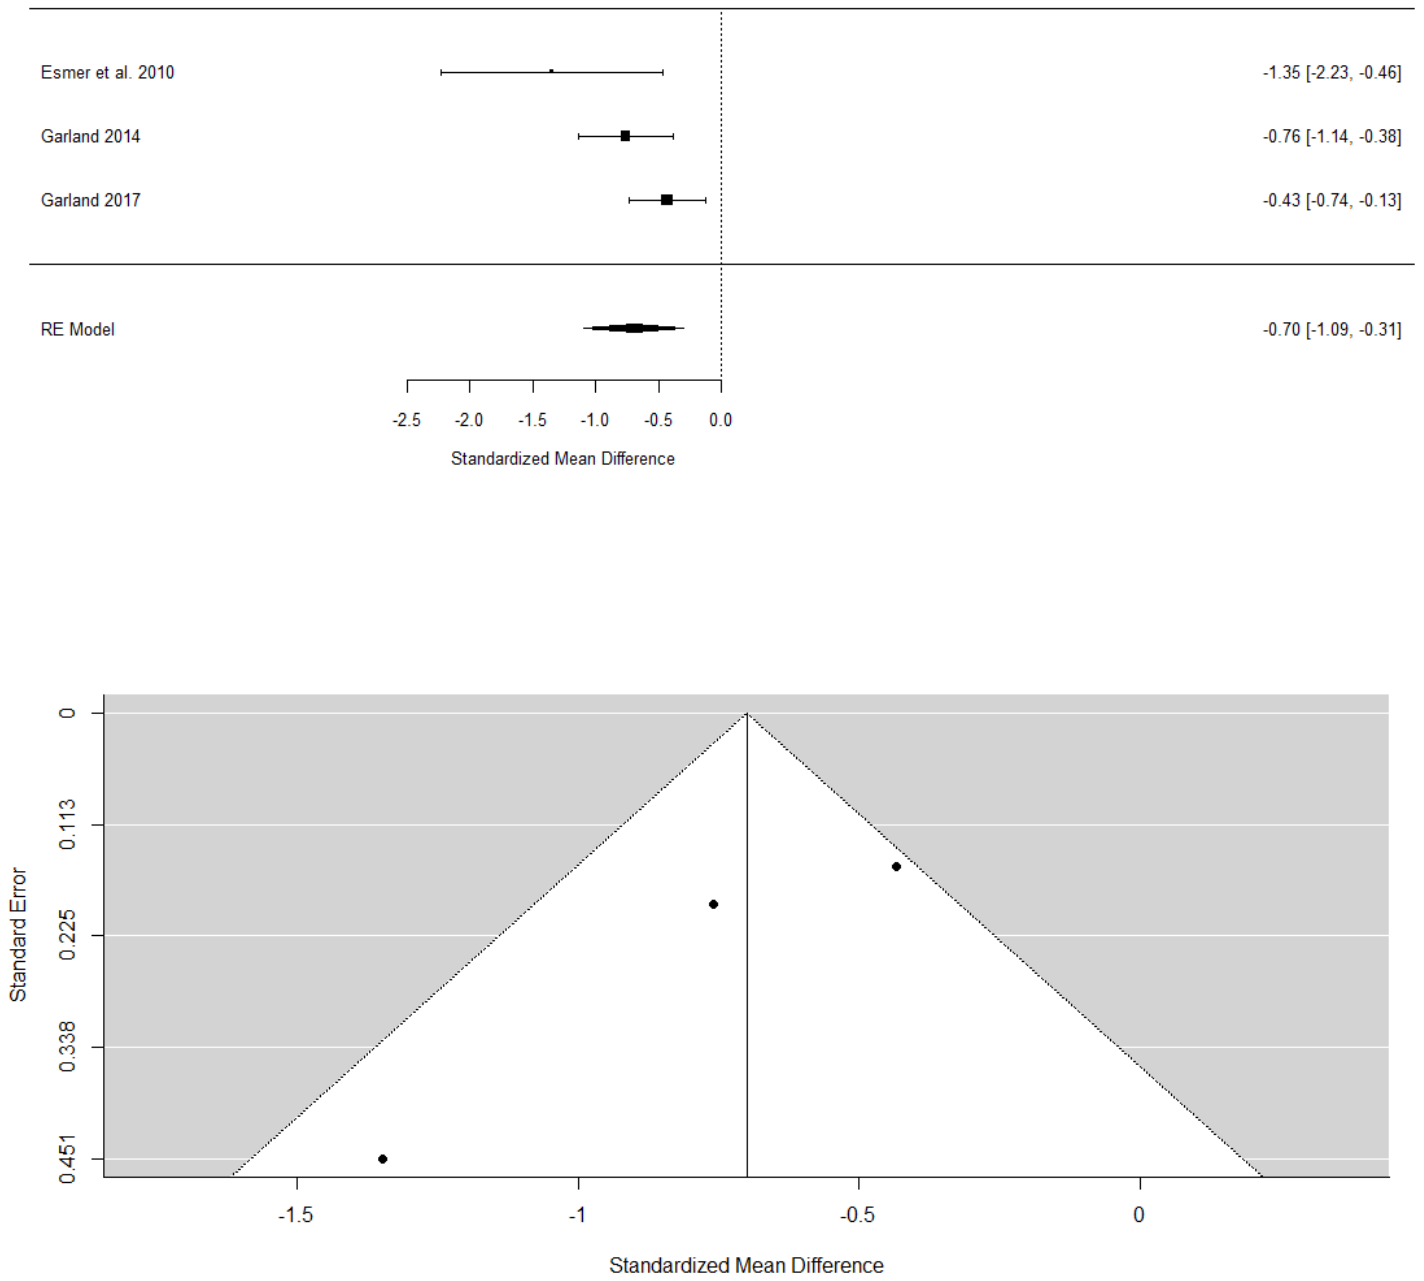

**eFigure 2.** Meta-analysis of Hypnosis Studies on Pain Outcomes

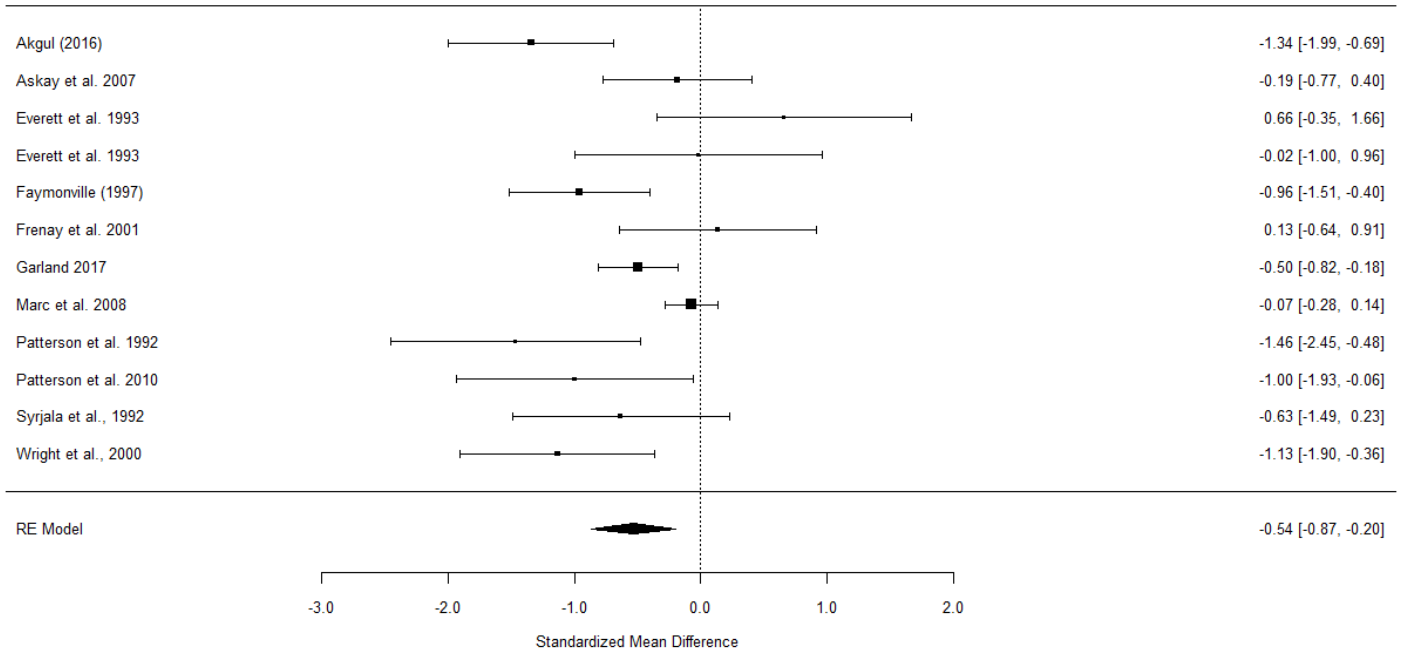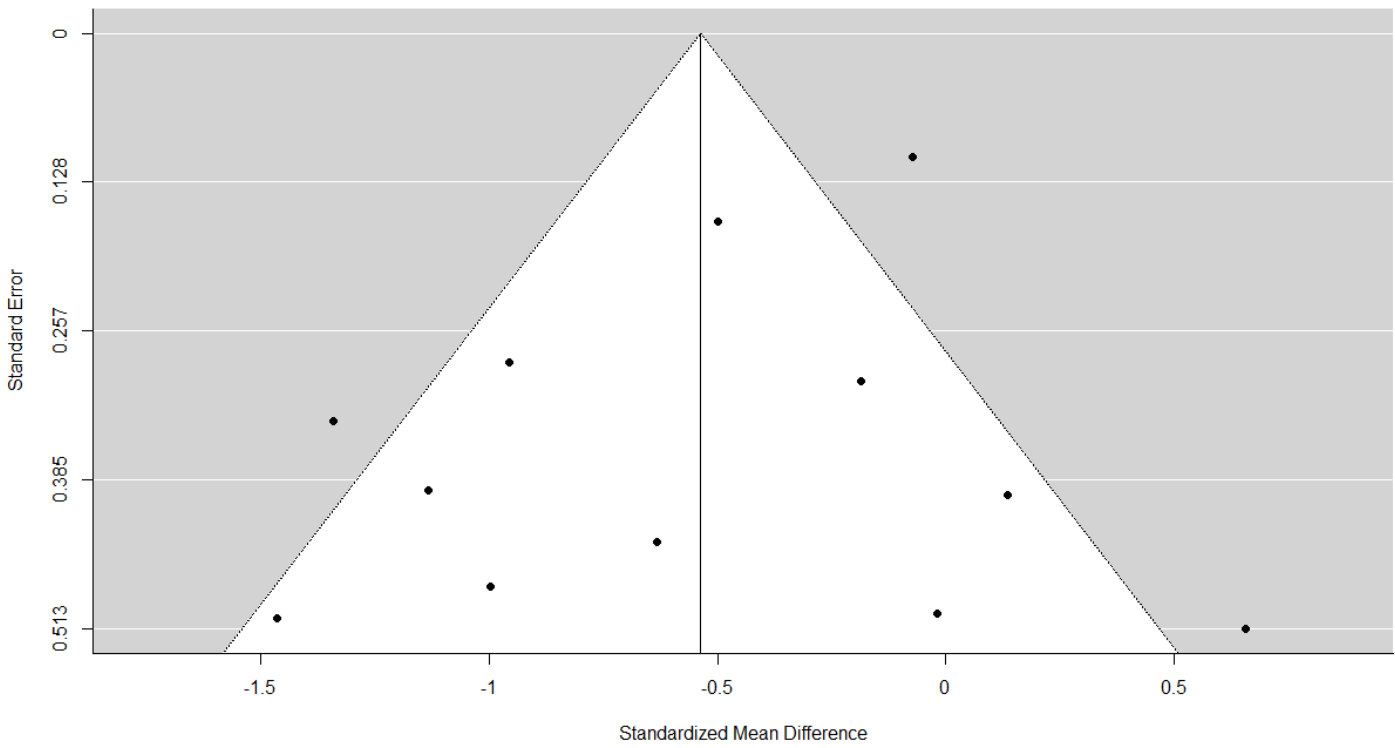

**eFigure 3.** Meta-analysis of Relaxation Studies on Pain Outcomes

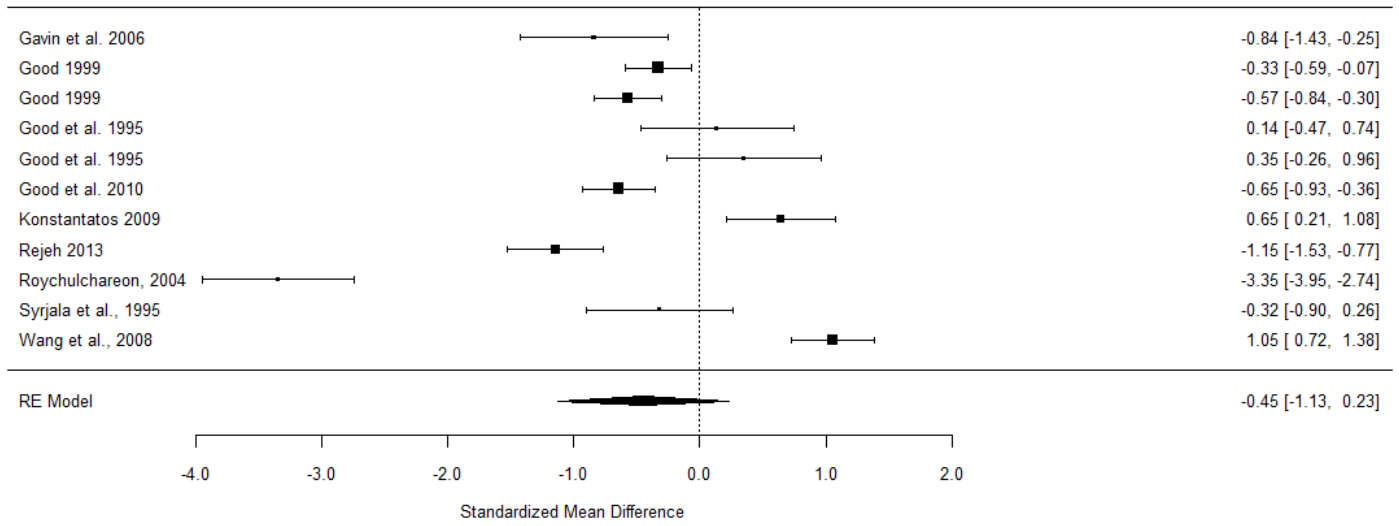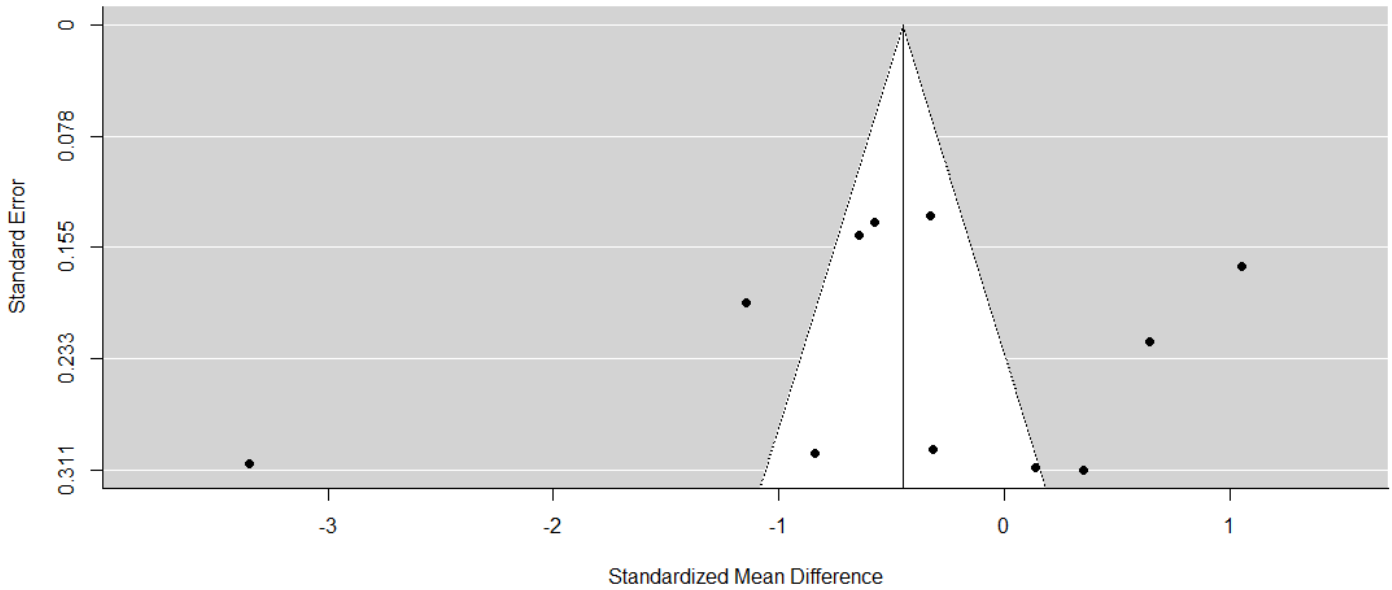

**eFigure 4.** Meta-analysis of Suggestion Studies on Pain Outcomes

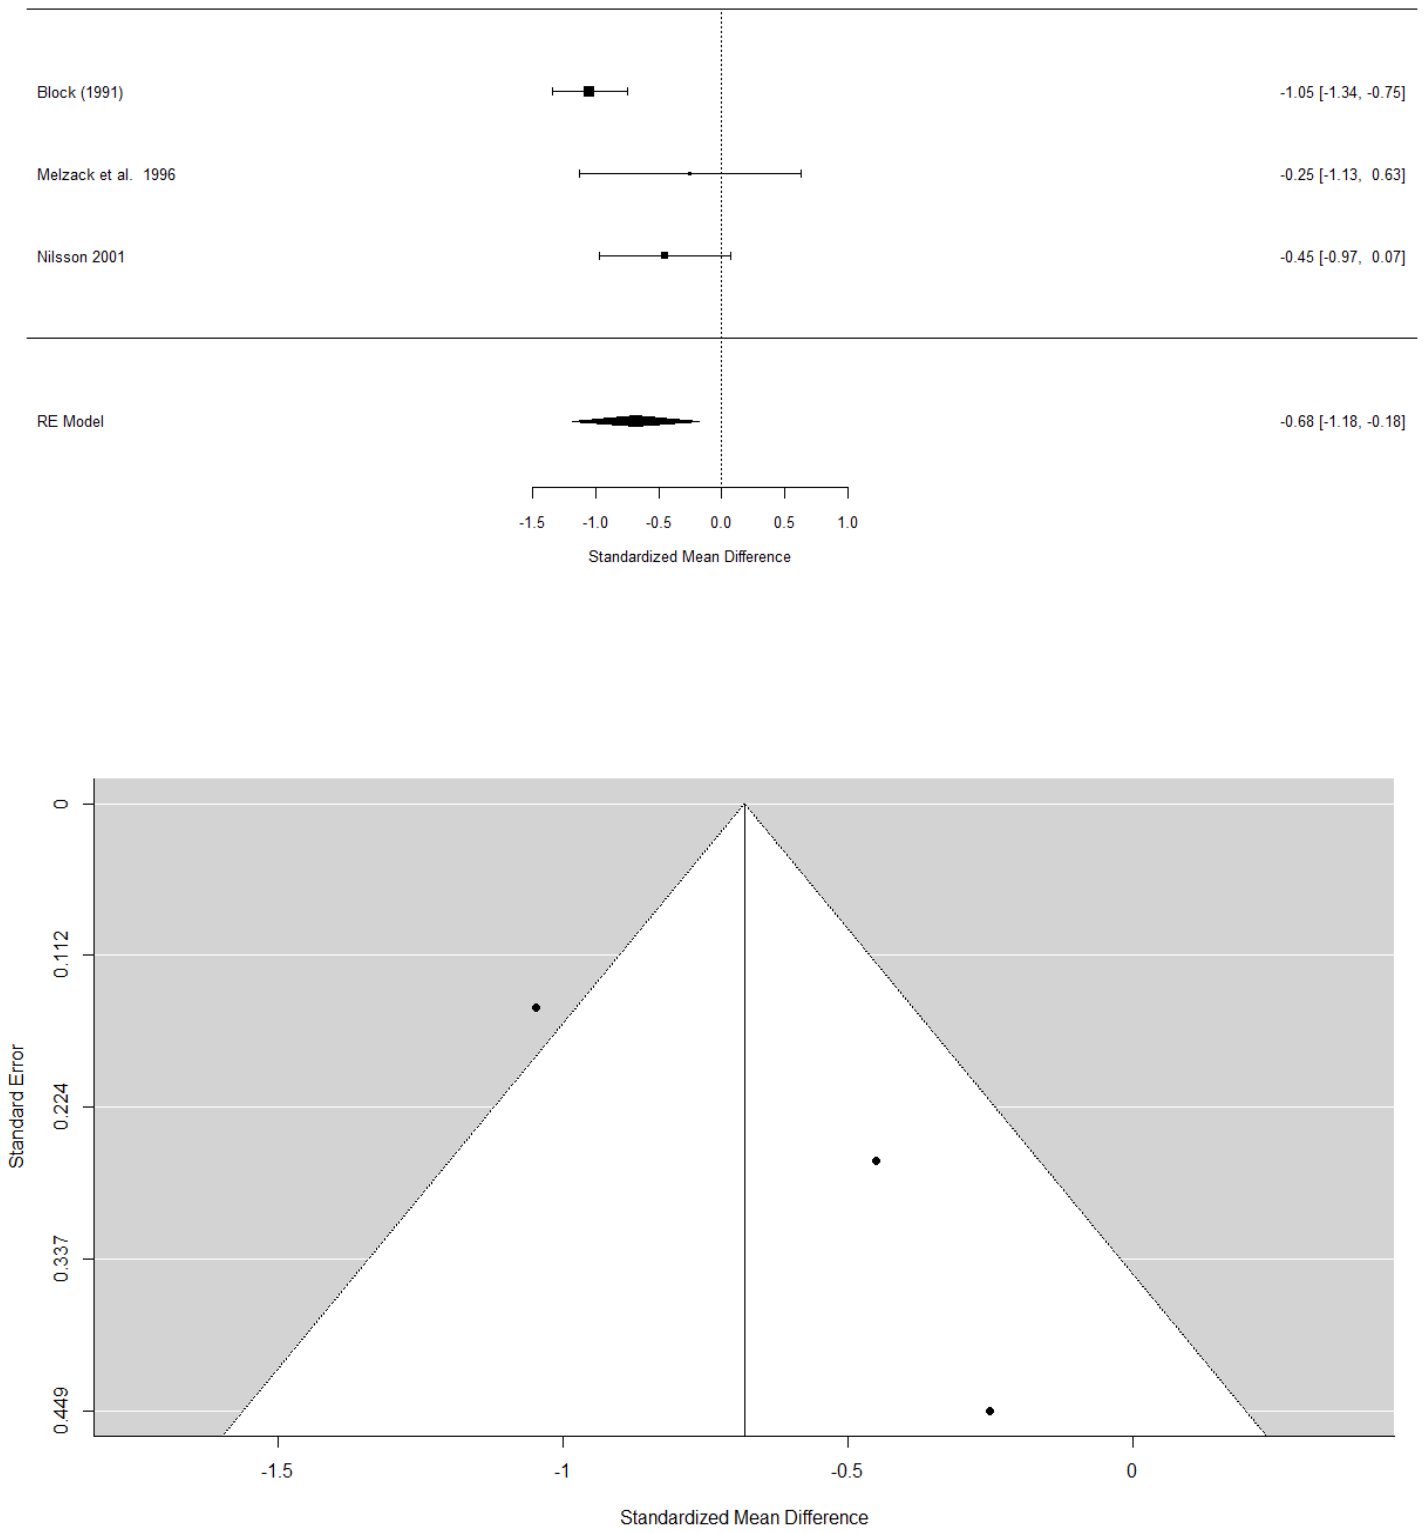



**eFigure 5.** Meta-analysis of Cognitive-Behavioral Therapy Studies on Pain Outcomes

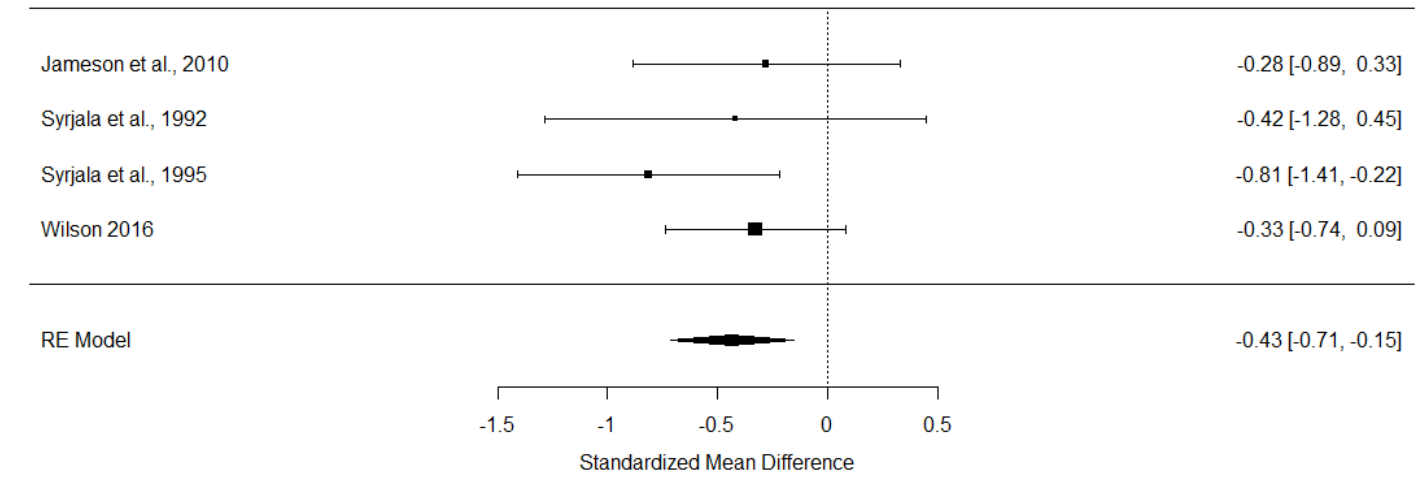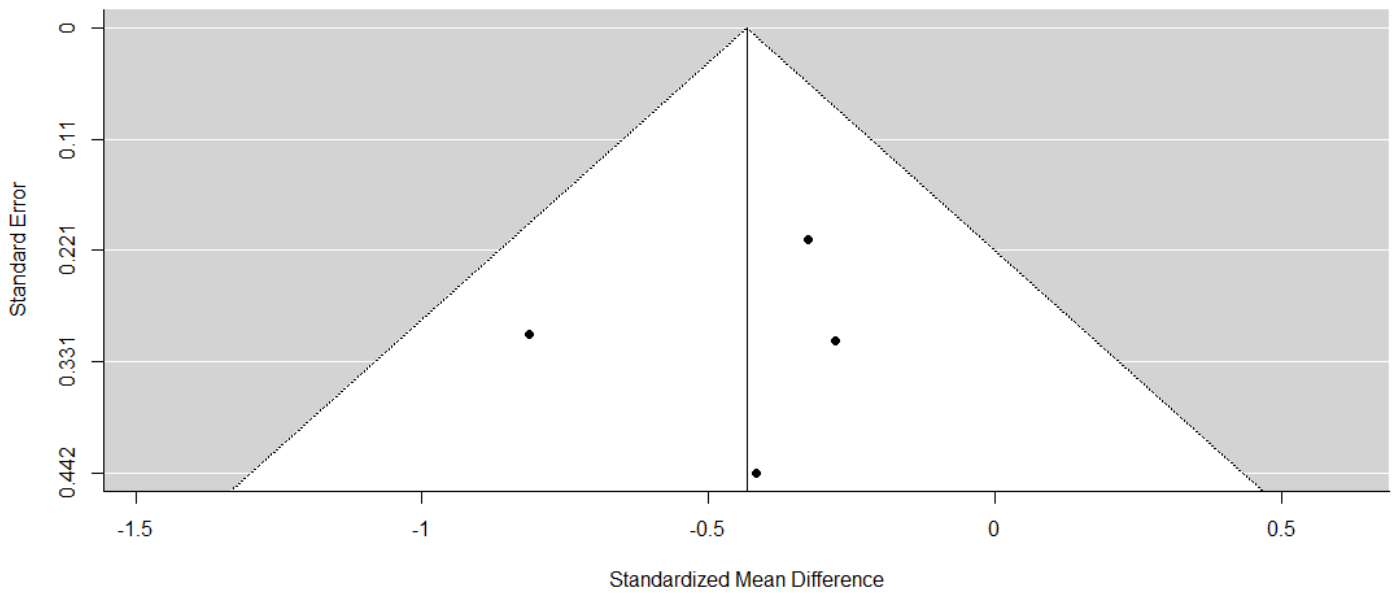

## eFigure 6. Baujut Plots

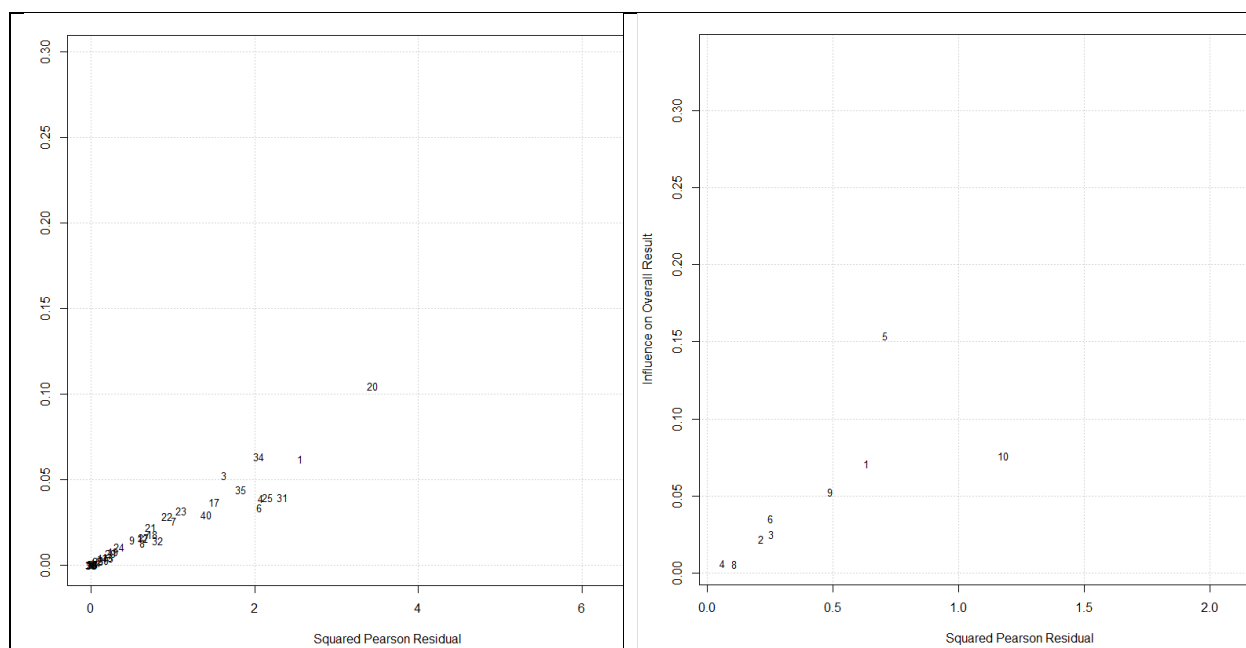

**eFigure 2. Baujut Plots for both Meta-analyses.** 2a depicts the Baujut plot for pain studies and 2b depicts the Baujut plot for opioid use studies

## eFigure 7. Funnel Plots

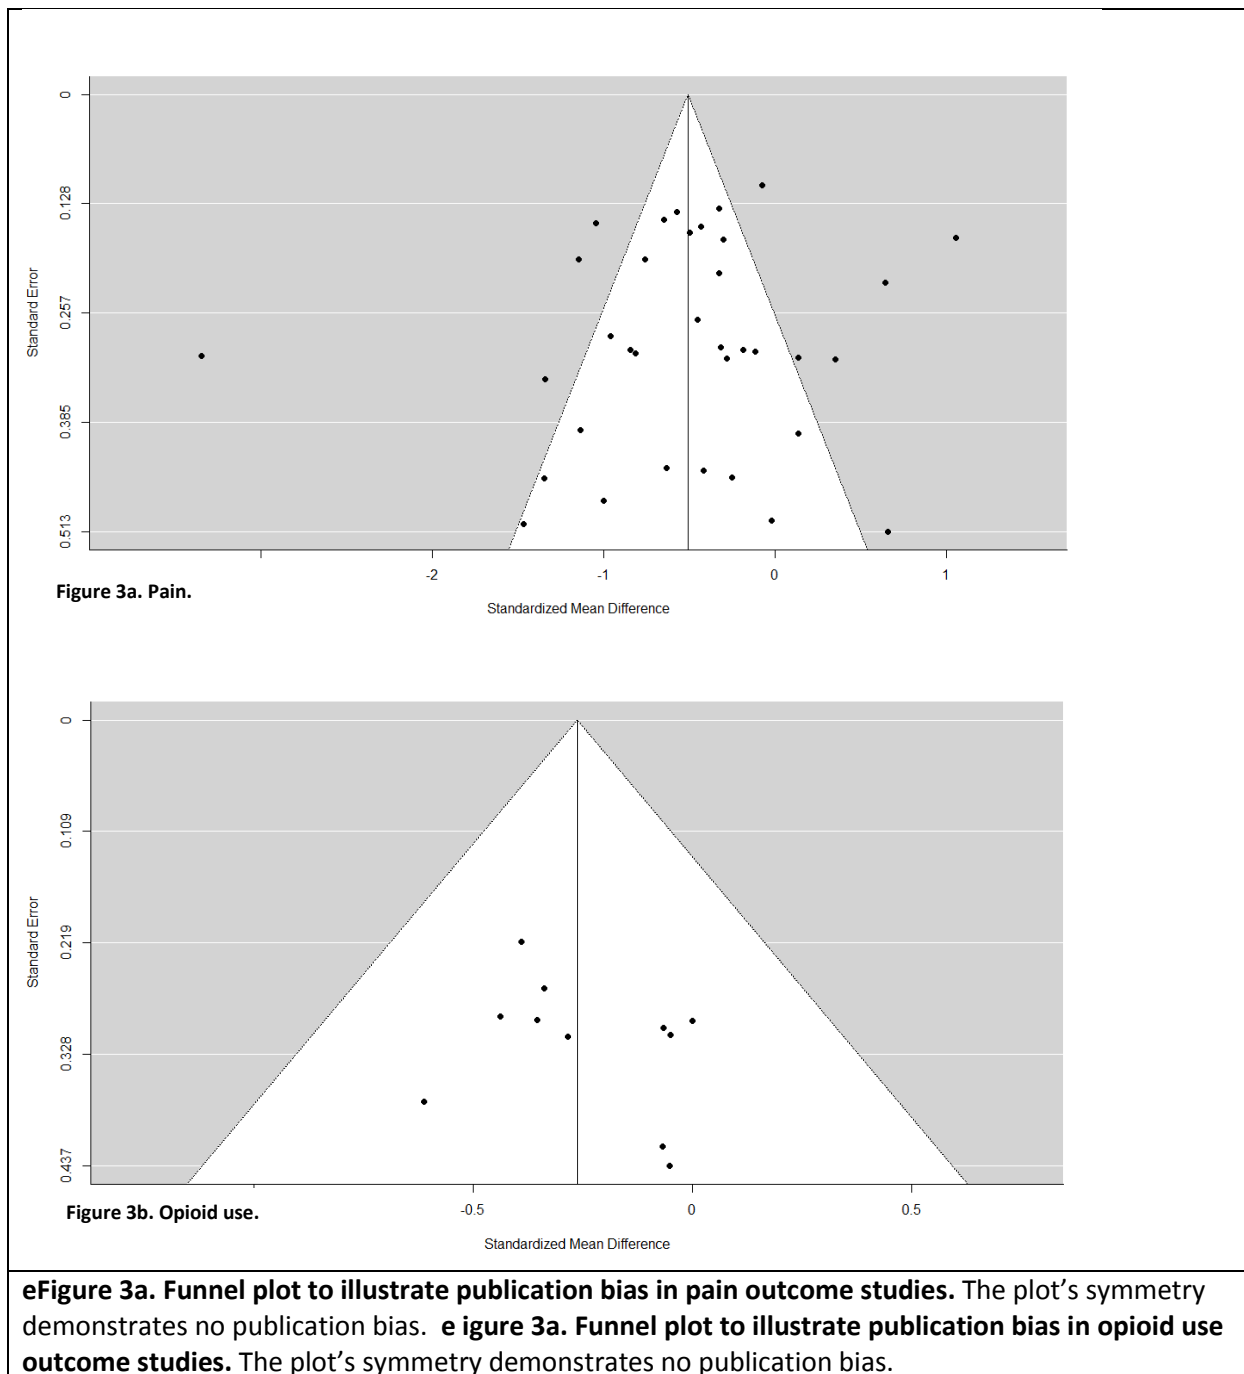

**eFigure 8. RoB Across All Studies**

Risk of bias summary: review authors' judgements about each risk of bias item for each included study.

|                                 | Random sequence generation (selection bias) | Allocation concealment (selection bias) | Blinding of participants and personnel (performance bias) | Blinding of outcome assessment (detection bias) | Incomplete outcome data (attrition bias) | Selective reporting (reporting bias) | Other bias |
|---------------------------------|---------------------------------------------|-----------------------------------------|-----------------------------------------------------------|-------------------------------------------------|------------------------------------------|--------------------------------------|------------|
| Akgul, 2016                     | ●                                           | ●                                       | ●                                                         | ●                                               | ●                                        | ●                                    | ●          |
| Anderson, 2006                  | ●                                           | ?                                       | ?                                                         | ●                                               | ●                                        | ●                                    | ●          |
| Antali, 2004                    | ●                                           | ?                                       | ?                                                         | ?                                               | ●                                        | ●                                    | ●          |
| Ashton, 1997                    | ?                                           | ?                                       | ?                                                         | ?                                               | ?                                        | ●                                    | ●          |
| Askay, 2007                     | ●                                           | ?                                       | ●                                                         | ●                                               | ●                                        | ●                                    | ●          |
| Bloch, 1991                     | ?                                           | ?                                       | ●                                                         | ●                                               | ?                                        | ●                                    | ●          |
| Dindo, 2018                     | ●                                           | ●                                       | ●                                                         | ●                                               | ●                                        | ●                                    | ●          |
| Enquist, 1997                   | ?                                           | ●                                       | ●                                                         | ●                                               | ●                                        | ?                                    | ●          |
| Esmer, 2010                     | ?                                           | ?                                       | ●                                                         | ?                                               | ●                                        | ?                                    | ●          |
| Everett, 1993                   | ?                                           | ?                                       | ?                                                         | ?                                               | ?                                        | ?                                    | ●          |
| Faymonville, 1997               | ?                                           | ?                                       | ●                                                         | ●                                               | ●                                        | ●                                    | ●          |
| Forward, 2015                   | ●                                           | ●                                       | ●                                                         | ●                                               | ●                                        | ●                                    | ●          |
| Frenay, 2001                    | ?                                           | ?                                       | ?                                                         | ?                                               | ●                                        | ●                                    | ●          |
| Garland, 2014a,b; Garland, 2017 | ●                                           | ●                                       | ●                                                         | ●                                               | ●                                        | ●                                    | ●          |
| Garland, 2017                   | ●                                           | ?                                       | ?                                                         | ?                                               | ●                                        | ●                                    | ●          |
| Gavin, 2006                     | ?                                           | ?                                       | ●                                                         | ●                                               | ●                                        | ●                                    | ●          |
| Ghoneim, 2000                   | ?                                           | ?                                       | ●                                                         | ?                                               | ?                                        | ?                                    | ?          |
| Gonzales, 2010                  | ●                                           | ?                                       | ●                                                         | ●                                               | ●                                        | ●                                    | ●          |
| Good, 1995                      | ?                                           | ●                                       | ?                                                         | ●                                               | ●                                        | ●                                    | ●          |
| Good, 1999                      | ●                                           | ?                                       | ●                                                         | ●                                               | ●                                        | ●                                    | ●          |
| Good, 2010                      | ●                                           | ●                                       | ●                                                         | ●                                               | ●                                        | ●                                    | ●          |
| Haase, 2005                     | ●                                           | ●                                       | ●                                                         | ●                                               | ●                                        | ●                                    | ●          |
| Jamison 2010                    | ●                                           | ?                                       | ?                                                         | ?                                               | ●                                        | ●                                    | ●          |
| Joudi, 2016                     | ?                                           | ?                                       | ?                                                         | ?                                               | ?                                        | ?                                    | ?          |
| Konstantatos, 2009              | ●                                           | ?                                       | ●                                                         | ●                                               | ●                                        | ●                                    | ●          |
| Kroenke 2009                    | ●                                           | ●                                       | ●                                                         | ●                                               | ●                                        | ●                                    | ●          |
| Kwekkeboom, 1999                | ?                                           | ?                                       | ●                                                         | ?                                               | ?                                        | ?                                    | ?          |
| Kwekkeboom, 2008                | ?                                           | ●                                       | ●                                                         | ●                                               | ●                                        | ●                                    | ●          |
| Laan, 1996                      | ?                                           | ?                                       | ●                                                         | ?                                               | ●                                        | ●                                    | ●          |
| Lang, 1996                      | ●                                           | ?                                       | ?                                                         | ●                                               | ●                                        | ●                                    | ●          |
| Lang, 2000                      | ?                                           | ●                                       | ●                                                         | ●                                               | ●                                        | ●                                    | ●          |
| Lang, 2008                      | ?                                           | ●                                       | ●                                                         | ●                                               | ●                                        | ●                                    | ●          |
| Mackey, 2010                    | ●                                           | ●                                       | ●                                                         | ?                                               | ●                                        | ●                                    | ●          |
| Mackey, 2018                    | ?                                           | ?                                       | ?                                                         | ●                                               | ●                                        | ●                                    | ●          |
| Mandle, 1990                    | ?                                           | ●                                       | ?                                                         | ?                                               | ●                                        | ●                                    | ●          |
| Maryande, 1998                  | ?                                           | ●                                       | ●                                                         | ●                                               | ●                                        | ●                                    | ●          |
| Marc, 2008                      | ●                                           | ●                                       | ●                                                         | ●                                               | ●                                        | ●                                    | ●          |
| McLintock, 1996                 | ?                                           | ?                                       | ●                                                         | ?                                               | ?                                        | ?                                    | ●          |
| Meizack, 1996                   | ●                                           | ?                                       | ●                                                         | ?                                               | ?                                        | ?                                    | ●          |
| Montgomery, 2007                | ●                                           | ?                                       | ●                                                         | ●                                               | ●                                        | ●                                    | ●          |
| Naylor 2008; 2010               | ?                                           | ?                                       | ?                                                         | ?                                               | ●                                        | ●                                    | ●          |
| Nilsson, 2001                   | ●                                           | ●                                       | ●                                                         | ?                                               | ●                                        | ●                                    | ●          |
| Nilsson, 2003                   | ●                                           | ●                                       | ?                                                         | ?                                               | ●                                        | ●                                    | ●          |
| Patterson, 1992                 | ?                                           | ?                                       | ●                                                         | ●                                               | ●                                        | ●                                    | ●          |
| Patterson, 2010                 | ?                                           | ?                                       | ?                                                         | ?                                               | ●                                        | ●                                    | ?          |
| Pijl, 2016                      | ●                                           | ?                                       | ●                                                         | ●                                               | ●                                        | ?                                    | ?          |
| Rejeh, 2013                     | ●                                           | ●                                       | ●                                                         | ?                                               | ?                                        | ?                                    | ?          |
| Roehrig 2016                    | ?                                           | ?                                       | ●                                                         | ●                                               | ●                                        | ●                                    | ●          |
| Roykulchareon, 2004             | ●                                           | ●                                       | ●                                                         | ?                                               | ●                                        | ●                                    | ●          |
| Storman, 1994                   | ?                                           | ?                                       | ?                                                         | ●                                               | ●                                        | ●                                    | ●          |
| Surman, 1974                    | ●                                           | ?                                       | ●                                                         | ?                                               | ●                                        | ●                                    | ●          |
| Syrjala, 1992                   | ?                                           | ?                                       | ?                                                         | ?                                               | ●                                        | ●                                    | ●          |
| Syrjala, 1995                   | ?                                           | ?                                       | ●                                                         | ●                                               | ●                                        | ●                                    | ●          |
| Tusek, 1997                     | ●                                           | ?                                       | ?                                                         | ?                                               | ●                                        | ●                                    | ●          |
| Wang, 2008                      | ?                                           | ?                                       | ●                                                         | ?                                               | ?                                        | ?                                    | ●          |
| Wang, 2015                      | ●                                           | ●                                       | ●                                                         | ●                                               | ?                                        | ●                                    | ●          |
| Wilson, 1981                    | ?                                           | ●                                       | ●                                                         | ?                                               | ●                                        | ●                                    | ●          |
| Wilson 2016                     | ?                                           | ●                                       | ●                                                         | ●                                               | ●                                        | ●                                    | ●          |
| Wright, 2000                    | ?                                           | ?                                       | ●                                                         | ●                                               | ●                                        | ●                                    | ●          |
| Zgierska, 2016                  | ●                                           | ●                                       | ●                                                         | ●                                               | ●                                        | ●                                    | ●          |

eFigure 9. RoB for Meditation Studies

|                                 | Random sequence generation (selection bias) | Allocation concealment (selection bias) | Blinding of participants and personnel (performance bias) | Blinding of outcome assessment (detection bias) | Incomplete outcome data (attrition bias) | Selective reporting (reporting bias) | Other bias |
|---------------------------------|---------------------------------------------|-----------------------------------------|-----------------------------------------------------------|-------------------------------------------------|------------------------------------------|--------------------------------------|------------|
| Dindo, 2018                     | +                                           | +                                       | +                                                         | +                                               | +                                        | +                                    | +          |
| Esmer, 2010                     | ?                                           | ?                                       | -                                                         | ?                                               | -                                        | ?                                    | -          |
| Garland, 2014a,b; Garland, 2017 | +                                           | +                                       | +                                                         | +                                               | +                                        | +                                    | +          |
| Garland, 2017                   | +                                           | ?                                       | ?                                                         | ?                                               | +                                        | +                                    | +          |
| Zgierska, 2016                  | +                                           | +                                       | -                                                         | -                                               | +                                        | +                                    | +          |

eFigure 10. RoB for Hypnosis Studies

|                   | Random sequence generation (selection bias) | Allocation concealment (selection bias) | Blinding of participants and personnel (performance bias) | Blinding of outcome assessment (detection bias) | Incomplete outcome data (attrition bias) | Selective reporting (reporting bias) | Other bias |
|-------------------|---------------------------------------------|-----------------------------------------|-----------------------------------------------------------|-------------------------------------------------|------------------------------------------|--------------------------------------|------------|
| Akgul, 2016       | +                                           | +                                       | +                                                         | +                                               | +                                        | +                                    | +          |
| Ashton, 1997      | ?                                           | ?                                       | +                                                         | ?                                               | ?                                        | +                                    | +          |
| Askay, 2007       | +                                           | ?                                       | +                                                         | +                                               | +                                        | +                                    | +          |
| Enqvist, 1997     | ?                                           | +                                       | +                                                         | +                                               | -                                        | ?                                    | +          |
| Everett, 1993     | ?                                           | ?                                       | +                                                         | ?                                               | ?                                        | ?                                    | +          |
| Faymonville, 1997 | ?                                           | ?                                       | -                                                         | -                                               | +                                        | +                                    | +          |
| Frenay, 2001      | ?                                           | ?                                       | +                                                         | ?                                               | -                                        | +                                    | +          |
| Garland, 2017     | +                                           | ?                                       | ?                                                         | ?                                               | +                                        | +                                    | +          |
| Ghoneim, 2000     | ?                                           | ?                                       | -                                                         | ?                                               | +                                        | ?                                    | ?          |
| Joudi, 2016       | ?                                           | ?                                       | ?                                                         | ?                                               | ?                                        | ?                                    | ?          |
| Lang, 1996        | +                                           | +                                       | ?                                                         | +                                               | ?                                        | +                                    | +          |
| Lang, 2000        | ?                                           | +                                       | +                                                         | +                                               | +                                        | +                                    | -          |
| Mackey, 2010      | -                                           | -                                       | +                                                         | +                                               | ?                                        | +                                    | +          |
| Mackey, 2018      | ?                                           | ?                                       | +                                                         | ?                                               | -                                        | +                                    | +          |
| Marc, 2008        | +                                           | +                                       | -                                                         | +                                               | +                                        | +                                    | +          |
| Montgomery, 2007  | +                                           | ?                                       | -                                                         | +                                               | +                                        | +                                    | +          |
| Patterson, 1992   | ?                                           | ?                                       | +                                                         | +                                               | -                                        | +                                    | +          |
| Patterson, 2010   | ?                                           | ?                                       | +                                                         | ?                                               | -                                        | -                                    | ?          |
| Surman, 1974      | -                                           | ?                                       | -                                                         | +                                               | ?                                        | +                                    | +          |
| Syrjala, 1992     | ?                                           | ?                                       | ?                                                         | ?                                               | +                                        | +                                    | +          |
| Wang, 2015        | +                                           | +                                       | -                                                         | +                                               | +                                        | ?                                    | +          |
| Wright, 2000      | ?                                           | ?                                       | -                                                         | -                                               | +                                        | +                                    | +          |

eFigure 11. RoB for Relaxation Studies

|                     | Random sequence generation (selection bias) | Allocation concealment (selection bias) | Blinding of participants and personnel (performance bias) | Blinding of outcome assessment (detection bias) | Incomplete outcome data (attrition bias) | Selective reporting (reporting bias) | Other bias |
|---------------------|---------------------------------------------|-----------------------------------------|-----------------------------------------------------------|-------------------------------------------------|------------------------------------------|--------------------------------------|------------|
| Anderson, 2006      | +                                           | ?                                       | ?                                                         | -                                               | -                                        | -                                    | +          |
| Gavin, 2006         | ?                                           | ?                                       | -                                                         | +                                               | -                                        | +                                    | +          |
| Good, 1995          | ?                                           | -                                       | ?                                                         | -                                               | -                                        | +                                    | +          |
| Good, 1999          | +                                           | ?                                       | +                                                         | +                                               | -                                        | +                                    | +          |
| Good, 2010          | +                                           | +                                       | +                                                         | -                                               | -                                        | +                                    | +          |
| Haase, 2005         | +                                           | +                                       | +                                                         | +                                               | +                                        | +                                    | +          |
| Konstantatos, 2009  | +                                           | ?                                       | -                                                         | -                                               | +                                        | +                                    | +          |
| Kwekkeboom, 2008    | ?                                           | +                                       | -                                                         | -                                               | -                                        | +                                    | +          |
| Mandle, 1990        | ?                                           | +                                       | +                                                         | ?                                               | ?                                        | +                                    | +          |
| Manyande, 1998      | ?                                           | +                                       | +                                                         | +                                               | -                                        | +                                    | +          |
| Rejeh, 2013         | -                                           | -                                       | -                                                         | -                                               | ?                                        | ?                                    | ?          |
| Roykulchareon, 2004 | +                                           | -                                       | -                                                         | -                                               | ?                                        | +                                    | +          |
| Sloman, 1994        | ?                                           | ?                                       | ?                                                         | ?                                               | -                                        | +                                    | +          |
| Syrjala, 1995       | ?                                           | ?                                       | +                                                         | +                                               | +                                        | +                                    | +          |
| Wang, 2008          | ?                                           | ?                                       | -                                                         | -                                               | ?                                        | ?                                    | +          |
| Wilson, 1981        | ?                                           | +                                       | +                                                         | +                                               | ?                                        | +                                    | +          |

eFigure 12. RoB for Guided Imagery Studies

|                  | Random sequence generation (selection bias) | Allocation concealment (selection bias) | Blinding of participants and personnel (performance bias) | Blinding of outcome assessment (detection bias) | Incomplete outcome data (attrition bias) | Selective reporting (reporting bias) | Other bias |
|------------------|---------------------------------------------|-----------------------------------------|-----------------------------------------------------------|-------------------------------------------------|------------------------------------------|--------------------------------------|------------|
| Anderson, 2006   | +                                           | ?                                       | ?                                                         | -                                               | -                                        | -                                    | +          |
| Antall, 2004     | -                                           | ?                                       | ?                                                         | ?                                               | +                                        | +                                    | -          |
| Forward, 2015    | +                                           | +                                       | -                                                         | -                                               | +                                        | +                                    | +          |
| Gonzales, 2010   | +                                           | ?                                       | +                                                         | +                                               | +                                        | +                                    | +          |
| Haase, 2005      | +                                           | +                                       | +                                                         | +                                               | +                                        | +                                    | +          |
| Kwekkeboom, 1999 | ?                                           | ?                                       | -                                                         | -                                               | ?                                        | +                                    | ?          |
| Kwekkeboom, 2008 | ?                                           | +                                       | -                                                         | -                                               | -                                        | +                                    | +          |
| Pijl, 2016       | +                                           | ?                                       | -                                                         | -                                               | -                                        | +                                    | ?          |
| Tusek, 1997      | +                                           | ?                                       | -                                                         | ?                                               | +                                        | +                                    | +          |



**eFigure 13.** RoB for Therapeutic Suggestion Studies

|                 | Random sequence generation (selection bias) | Allocation concealment (selection bias) | Blinding of participants and personnel (performance bias) | Blinding of outcome assessment (detection bias) | Incomplete outcome data (attrition bias) | Selective reporting (reporting bias) | Other bias |
|-----------------|---------------------------------------------|-----------------------------------------|-----------------------------------------------------------|-------------------------------------------------|------------------------------------------|--------------------------------------|------------|
| Block, 1991     | ?                                           | ?                                       | +                                                         | +                                               | ?                                        | +                                    | +          |
| Laan, 1996      | ?                                           | ?                                       | +                                                         | +                                               | ?                                        | +                                    | +          |
| McLintock, 1990 | ?                                           | ?                                       | +                                                         | +                                               | ?                                        | ?                                    | +          |
| Melzack, 1996   | +                                           | ?                                       | +                                                         | +                                               | ?                                        | +                                    | -          |
| Nilsson, 2001   | +                                           | +                                       | +                                                         | +                                               | ?                                        | +                                    | +          |
| Nilsson, 2003   | +                                           | +                                       | +                                                         | ?                                               | ?                                        | -                                    | +          |

eFigure 14. RoB for CBT Studies

|                  | Random sequence generation (selection bias) | Allocation concealment (selection bias) | Blinding of participants and personnel (performance bias) | Blinding of outcome assessment (detection bias) | Incomplete outcome data (attrition bias) | Selective reporting (reporting bias) | Other bias |
|------------------|---------------------------------------------|-----------------------------------------|-----------------------------------------------------------|-------------------------------------------------|------------------------------------------|--------------------------------------|------------|
| Jamison 2010     | +                                           | ?                                       | ?                                                         | ?                                               | +                                        | +                                    | +          |
| Kroenke 2009     | +                                           | +                                       | +                                                         | +                                               | +                                        | +                                    | +          |
| Naylor 2008;2010 | ?                                           | +                                       | ?                                                         | ?                                               | +                                        | +                                    | +          |
| Rolving 2016     | ?                                           | ?                                       | +                                                         | +                                               | +                                        | +                                    | +          |
| Syrjala 1992     | ?                                           | ?                                       | ?                                                         | ?                                               | +                                        | +                                    | +          |
| Syrjala 1995     | ?                                           | ?                                       | +                                                         | +                                               | +                                        | +                                    | +          |
| Wilson 2016      | ?                                           | +                                       | -                                                         | -                                               | -                                        | +                                    | +          |
